# Supplementary material for: Carbohydrates as potentially versatile core subcarriers for multivalent immunogens
Source: Royal Society of Chemistry journal article supplement (doi:10.1039/c6ra27181b), 2017-01-01

## Supporting Information

### Carbohydrates as potentially versatile core subcarriers for multivalent immunogens

Divya Kushwaha, Peng Xu and Pavol Kováč\*

*NIDDK, LBC, National Institutes of Health, Bethesda, MD 20892-0815 (U.S.A.)*

\*Corresponding author: Tel 301-496-3569, Fax 301-480-5703, E-mail: kpn@helix.nih.gov (P.K.)

---

#### Table of Contents:

|    |                                                                                                            |       |
|----|------------------------------------------------------------------------------------------------------------|-------|
| 1. | <sup>1</sup> H & <sup>13</sup> C NMR spectra of the compounds <b>2-4,7-8, 11-13, 16-17, &amp; 19-24</b>    | 2-33  |
| 2. | <sup>1</sup> H & <sup>13</sup> C NMR spectra of squaric acid monoester derivatives <b>25</b> and <b>27</b> | 34-37 |
| 3. | SELDI-TOF spectra of cluster-BSA conjugates <b>26</b> and <b>28</b>                                        | 38    |

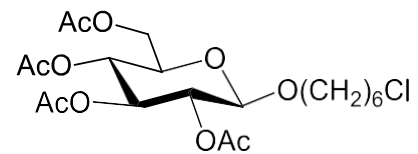2,  $^1\text{H}$  NMR (600 MHz,  $\text{CDCl}_3$ )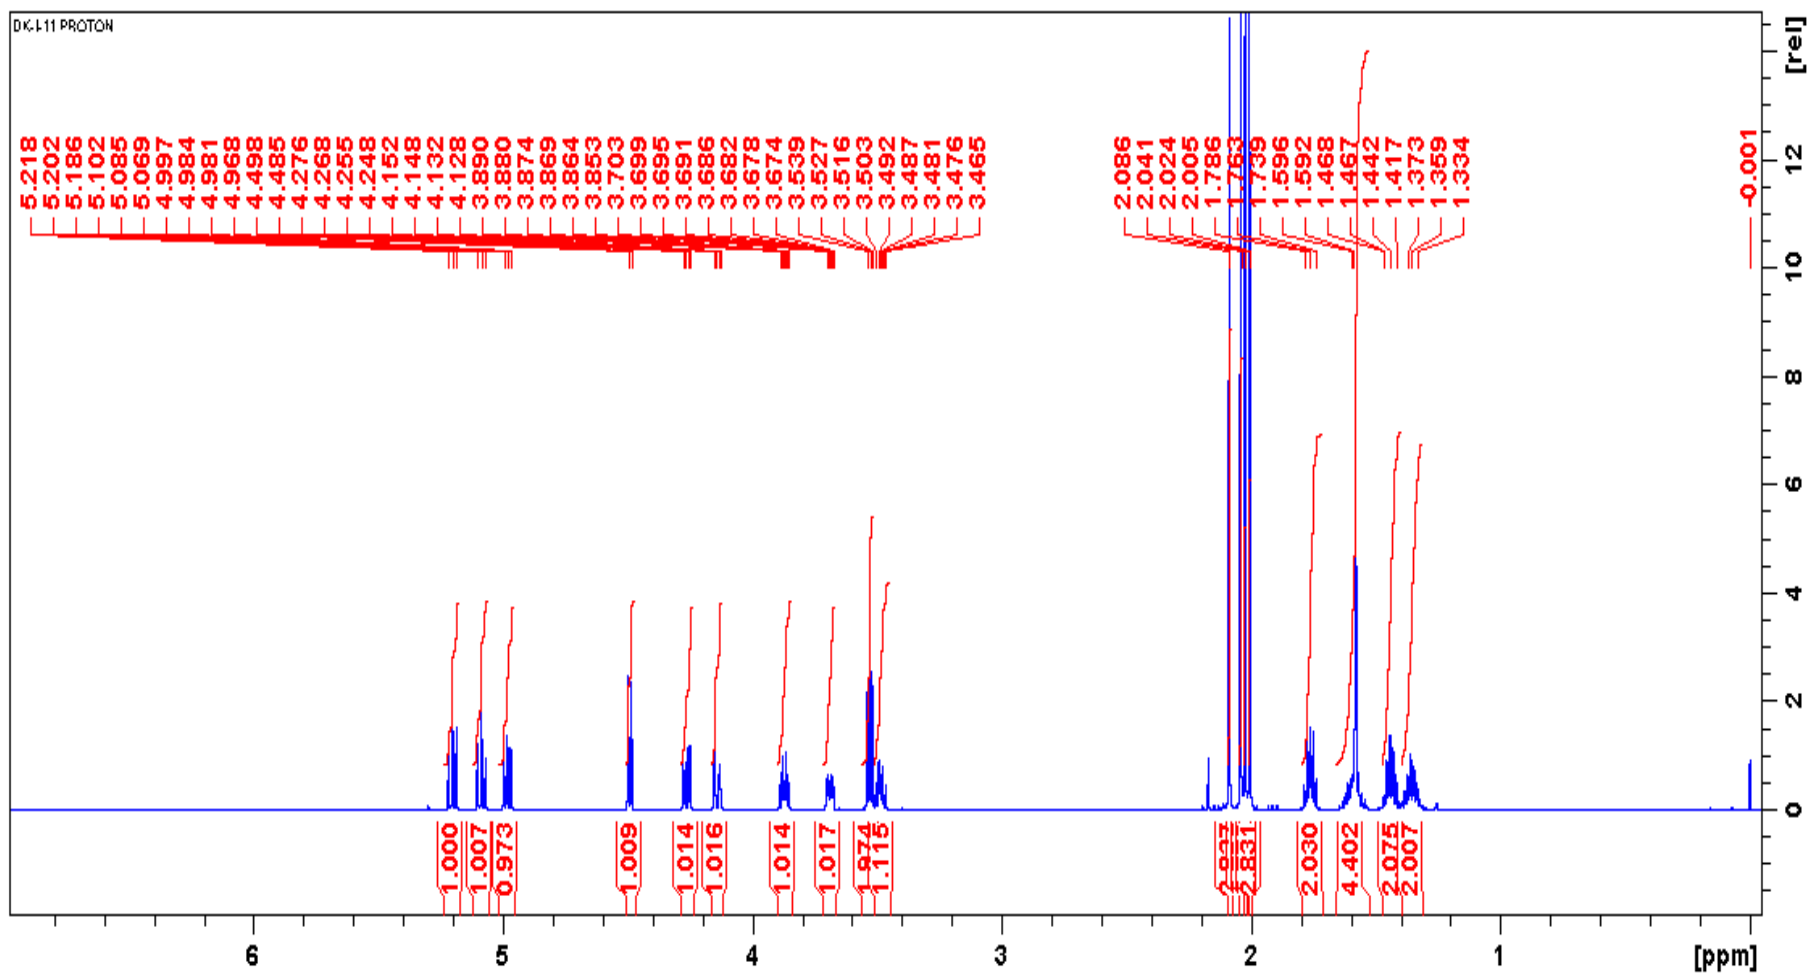

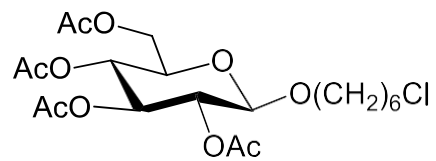

2, <sup>13</sup>C NMR (150 MHz, CDCl<sub>3</sub>)

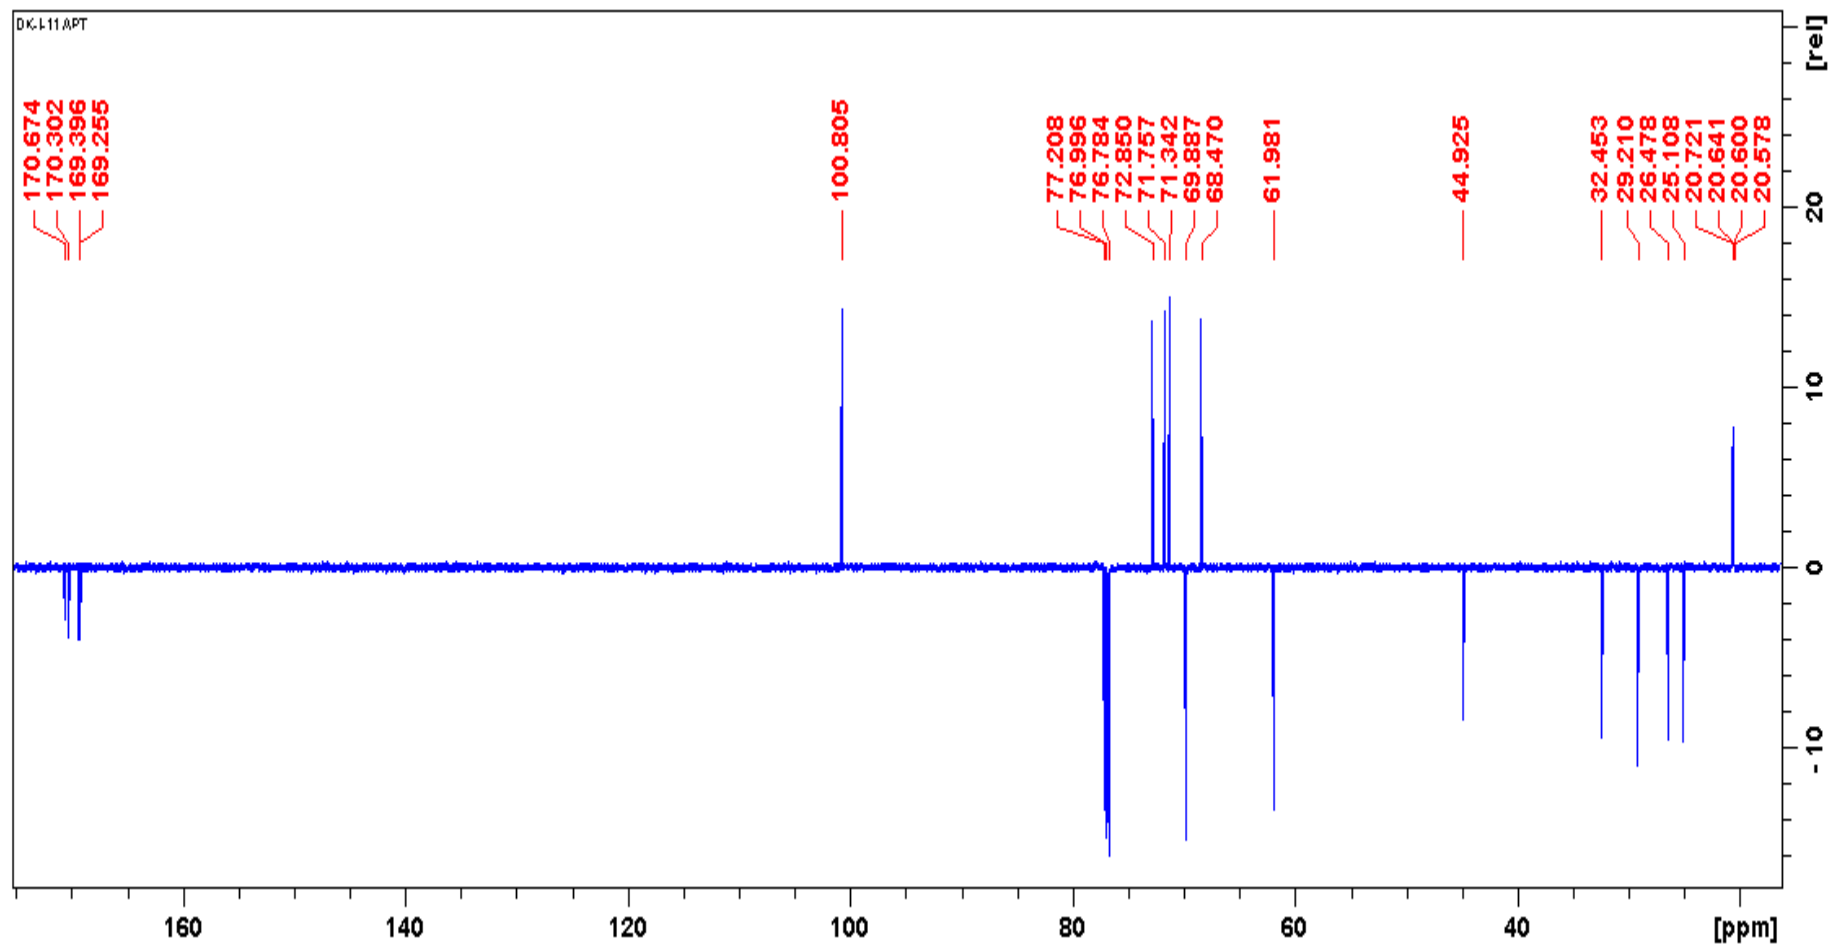

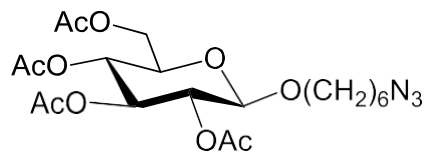

**3**, <sup>1</sup>H NMR (600 MHz, CDCl<sub>3</sub>)

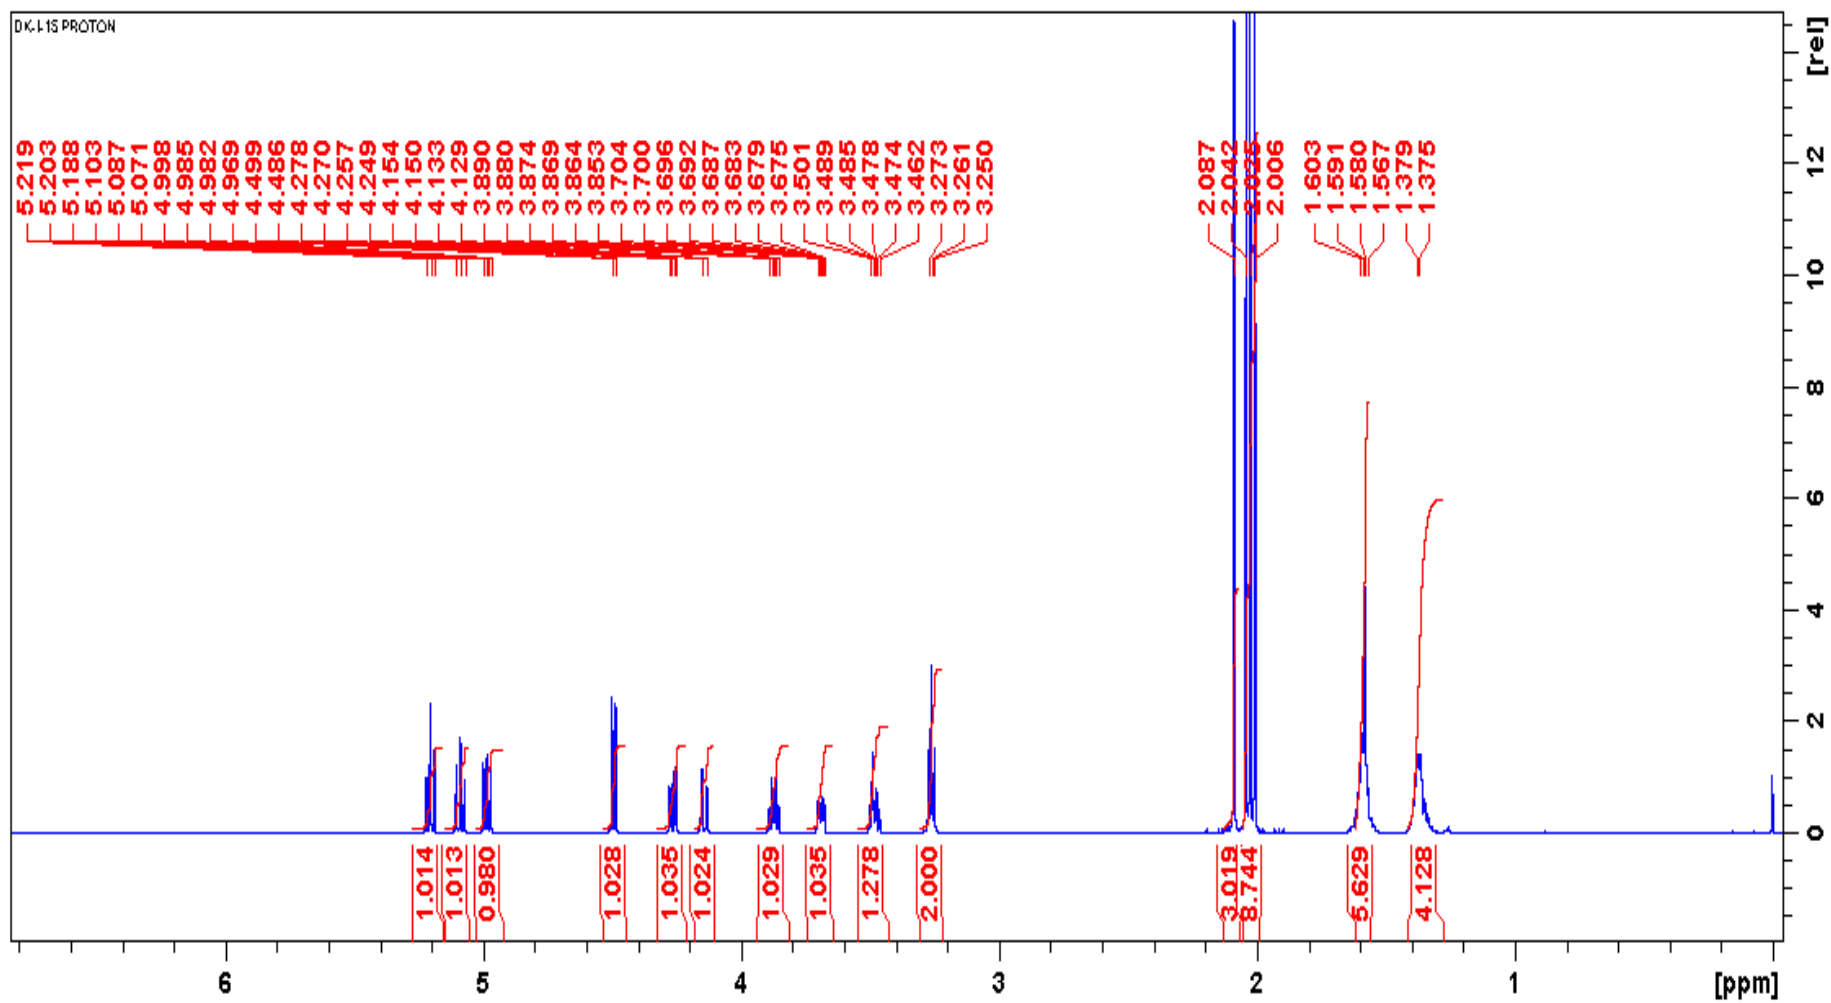

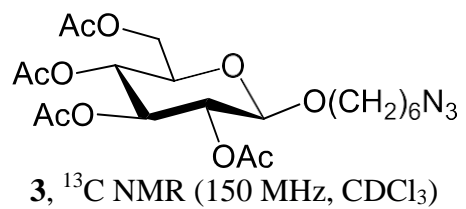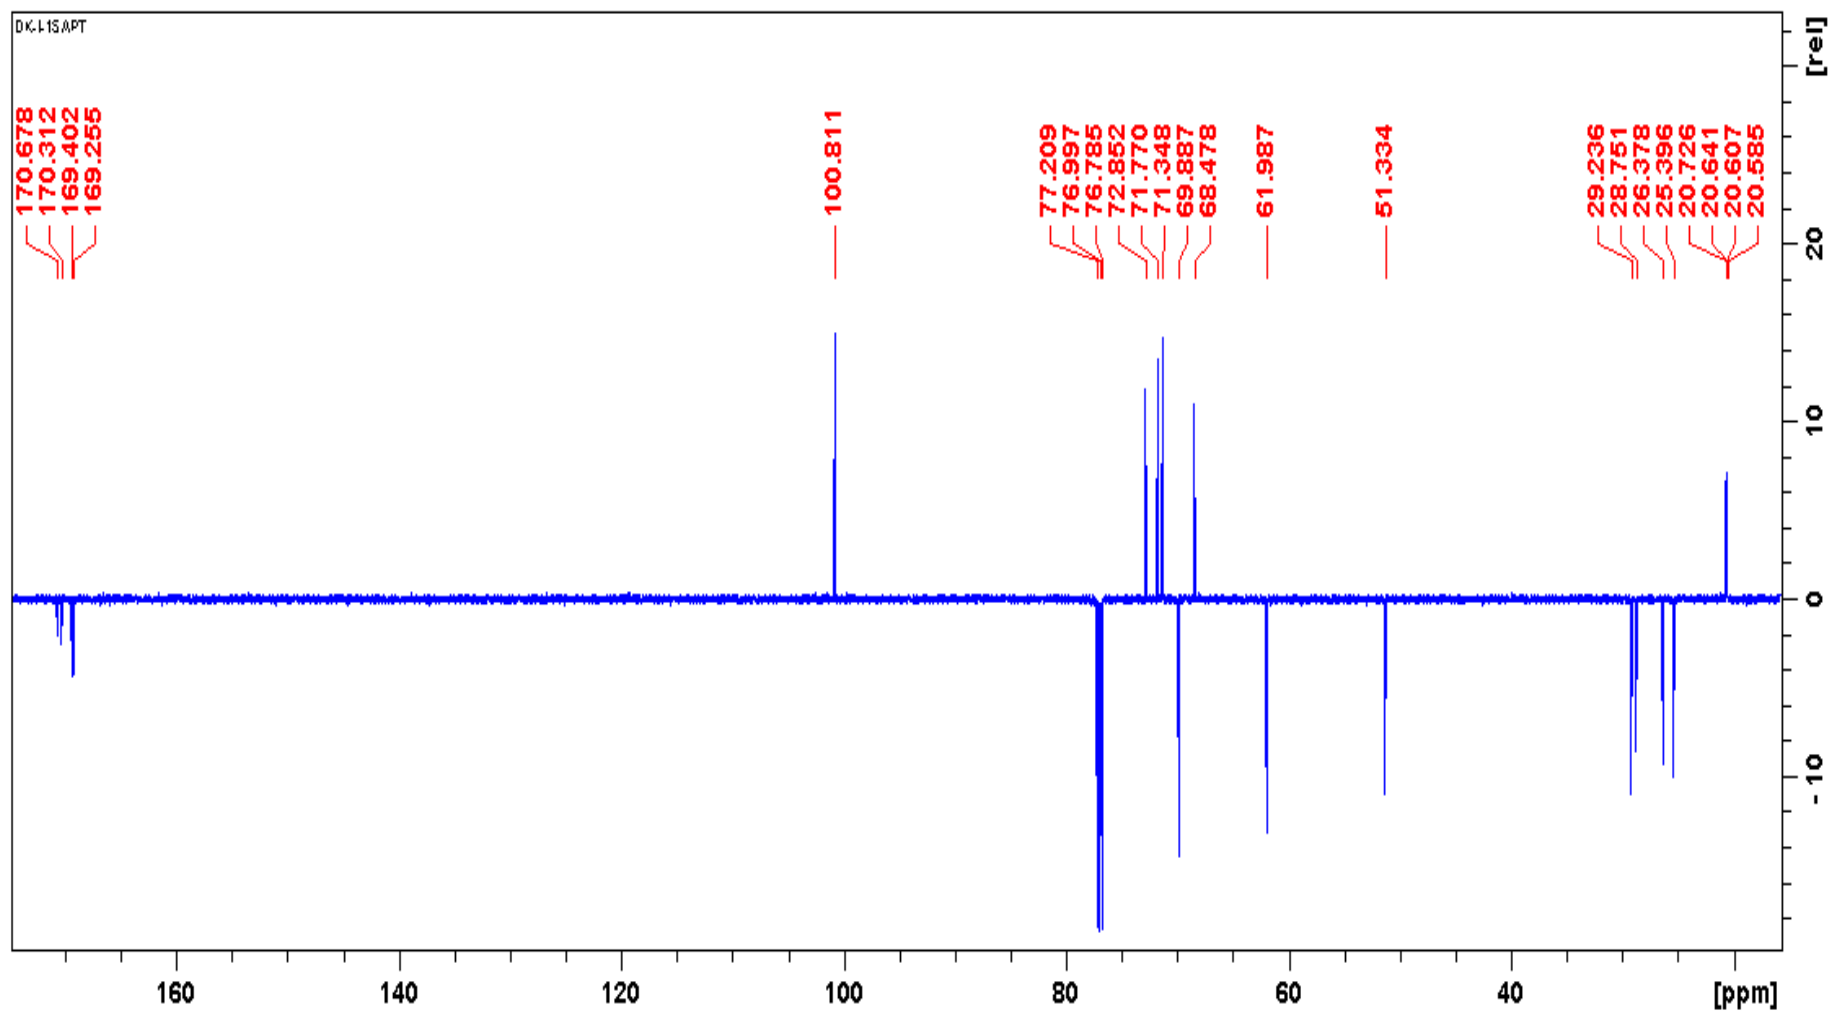

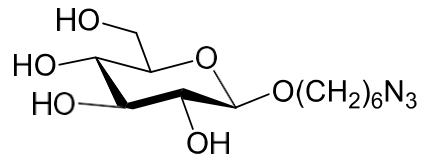4,  $^1\text{H}$  NMR (600 MHz, MeOD)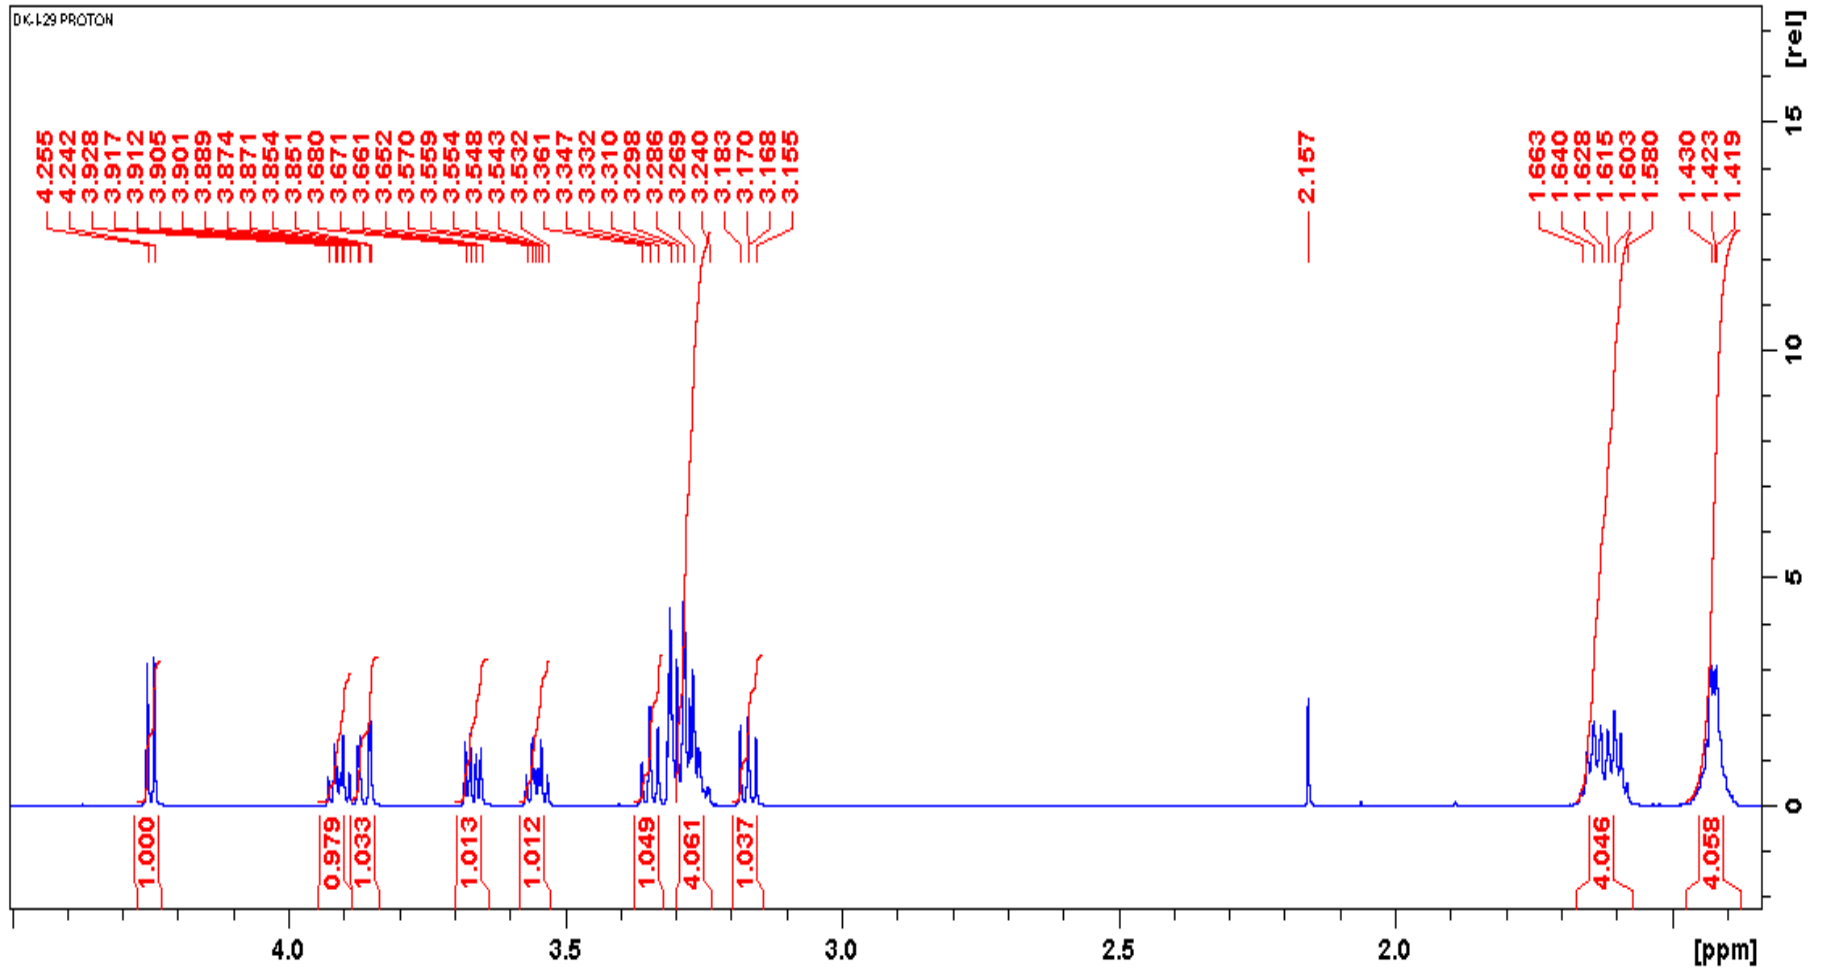

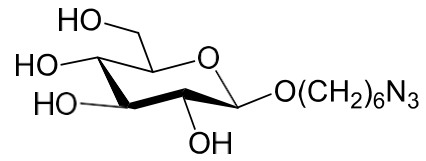

4,  $^{13}\text{C}$  NMR (150 MHz, MeOD)

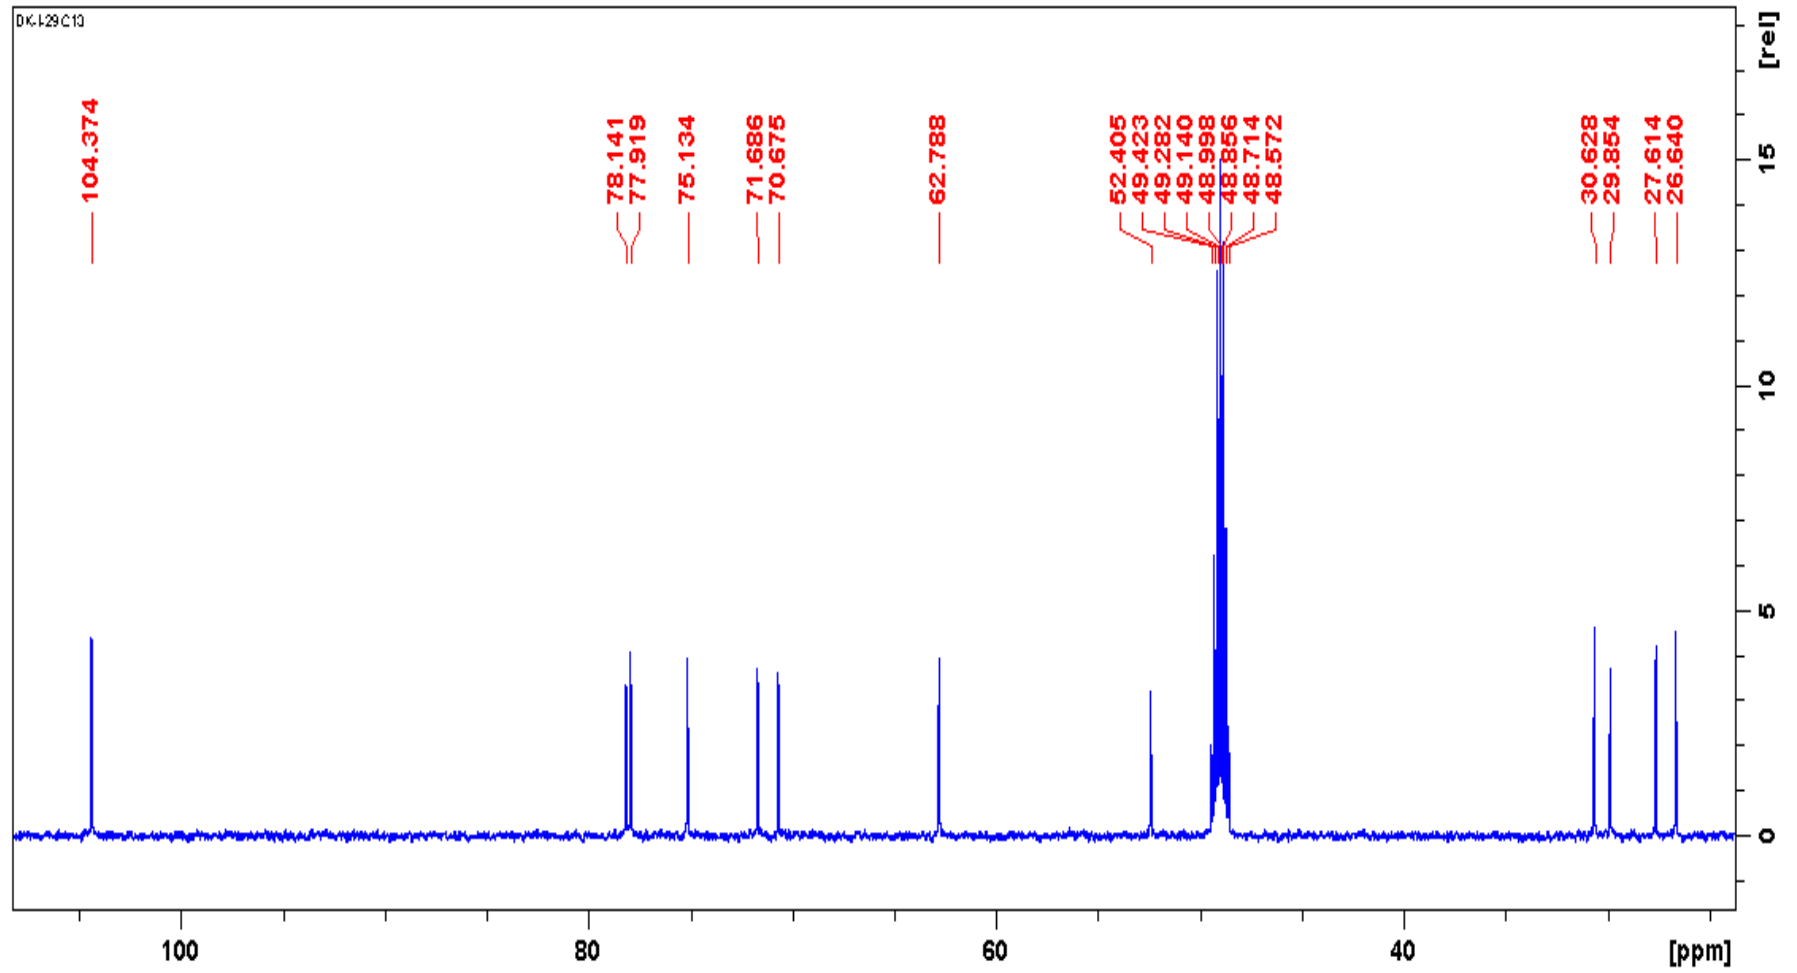

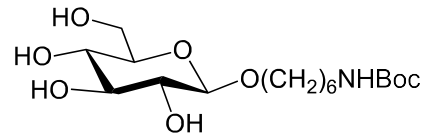7,  $^1\text{H}$  NMR (600 MHz, MeOD)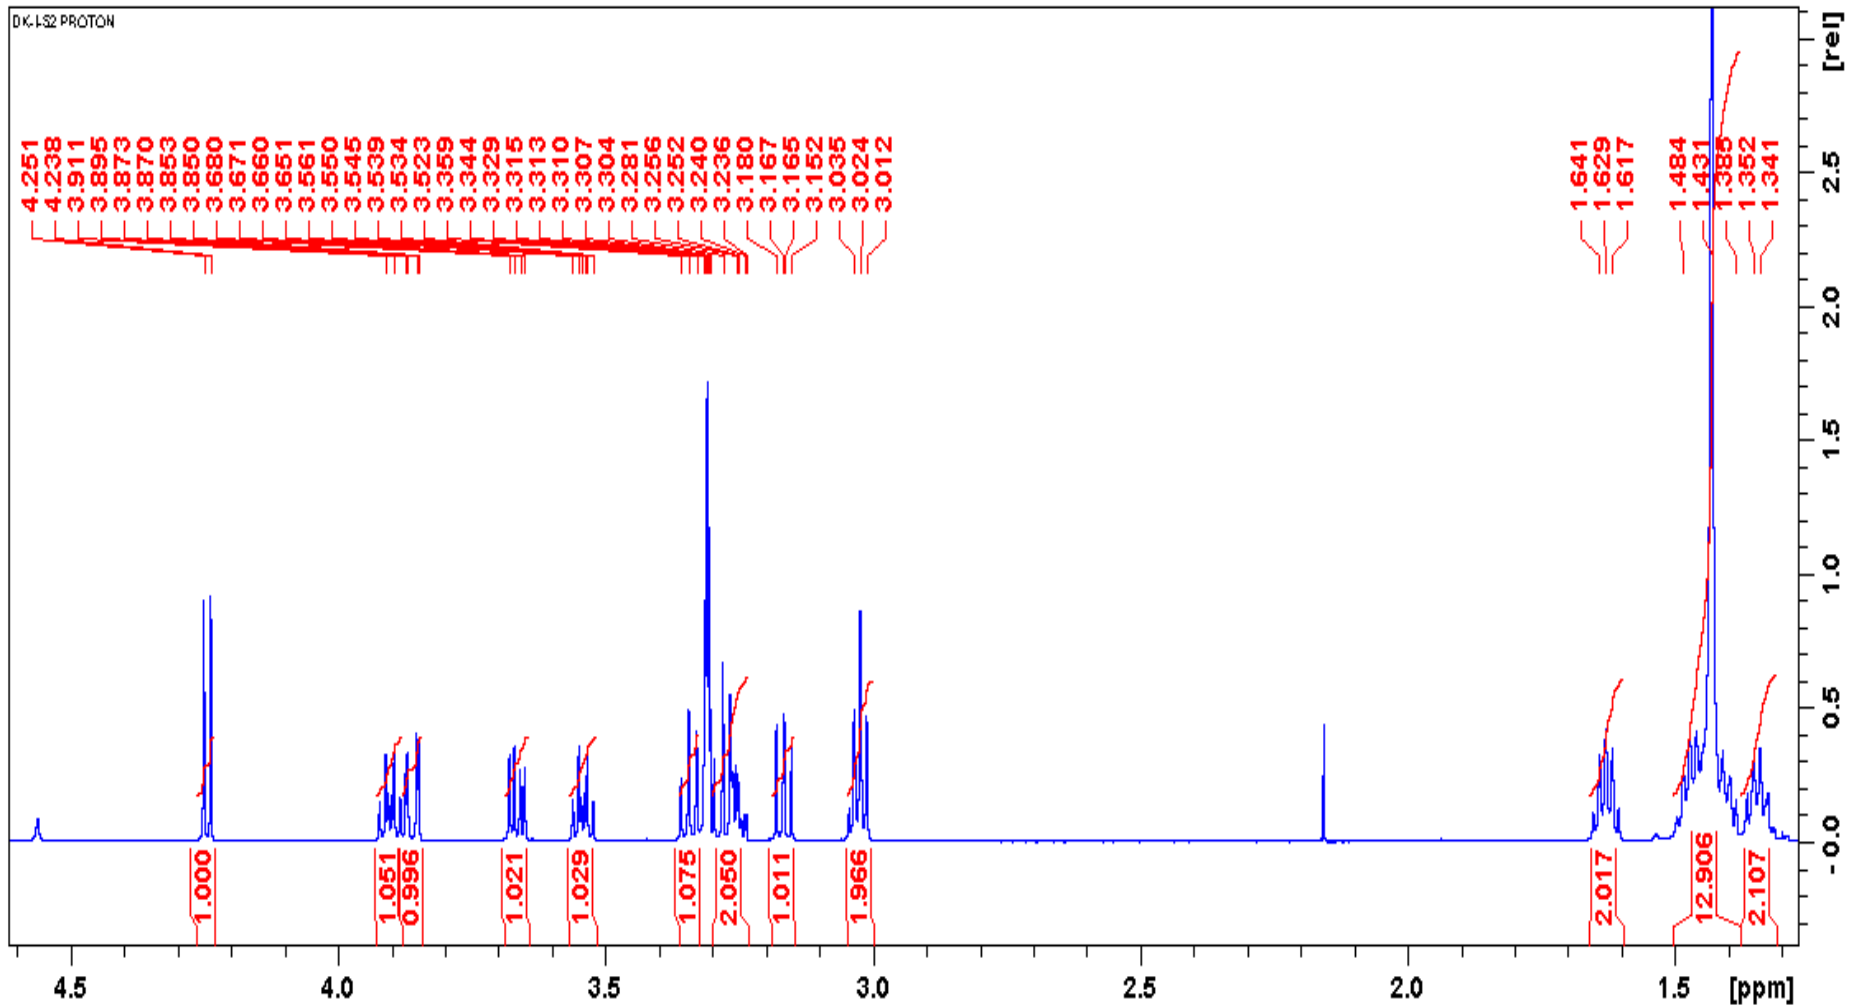



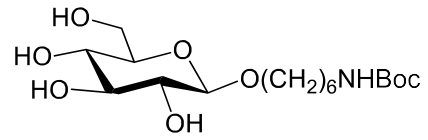7,  $^{13}\text{C}$  NMR (150 MHz, MeOD)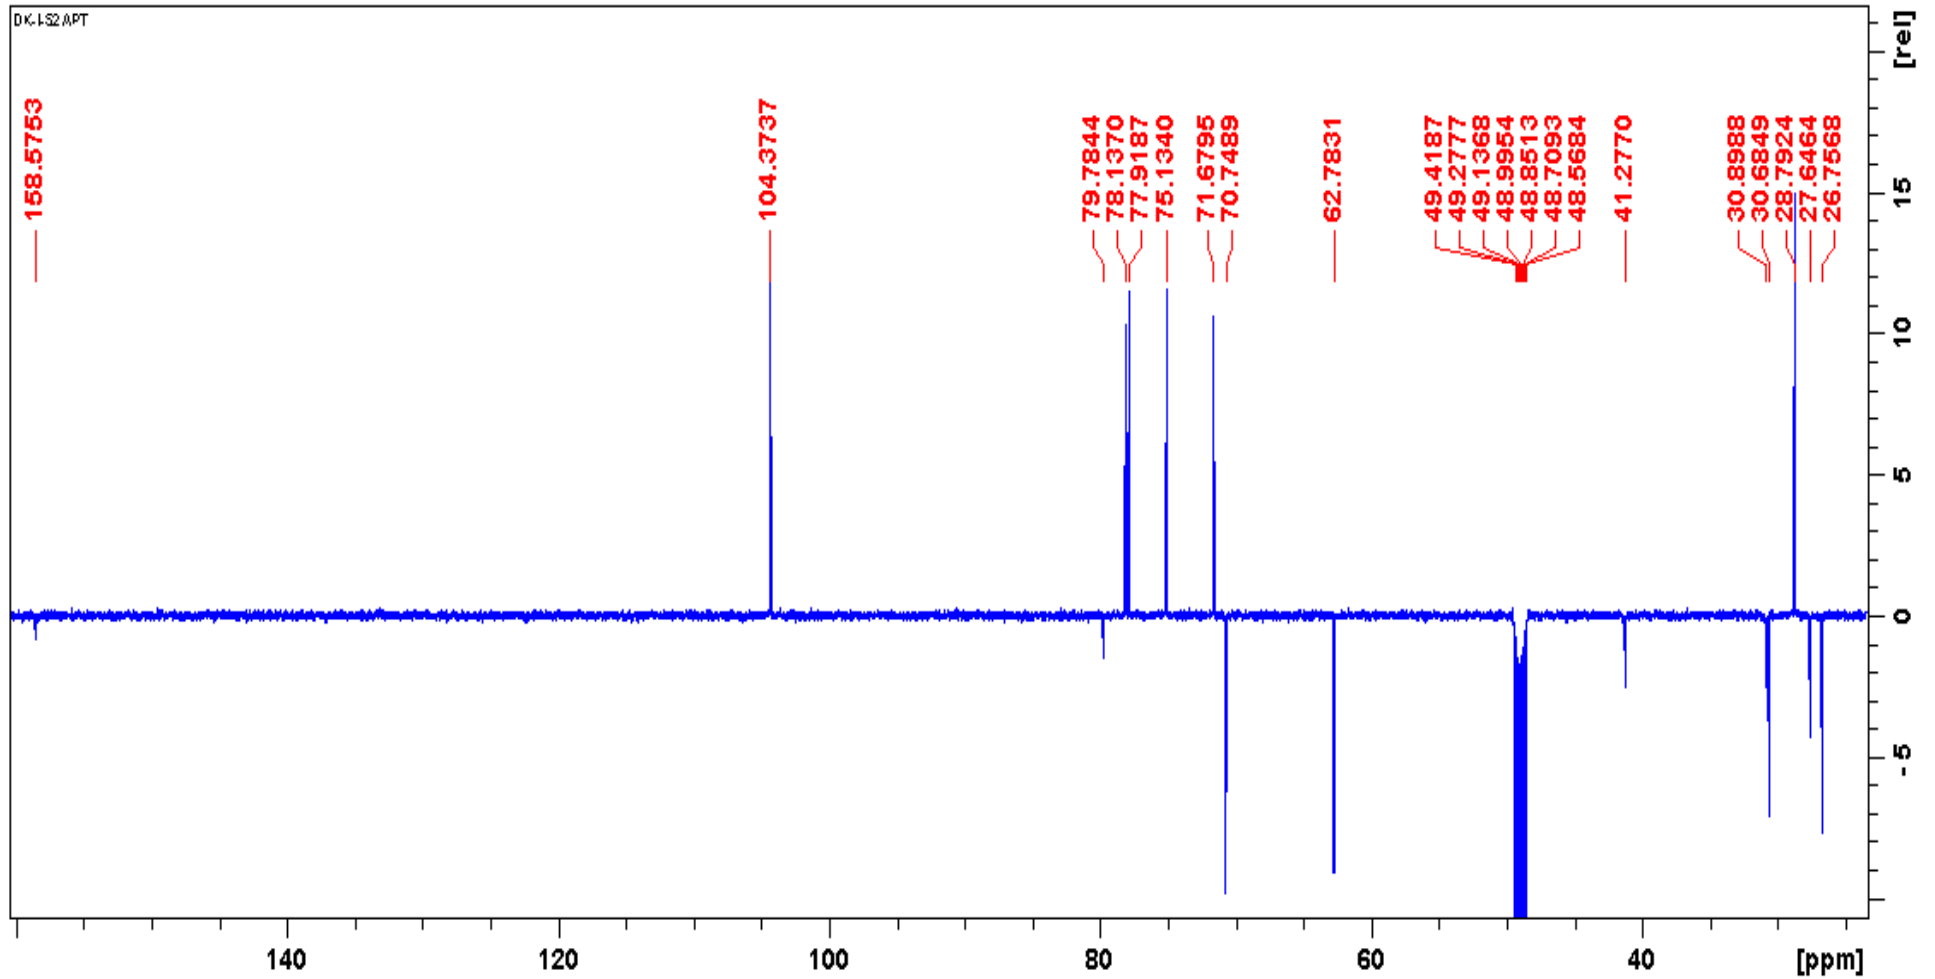

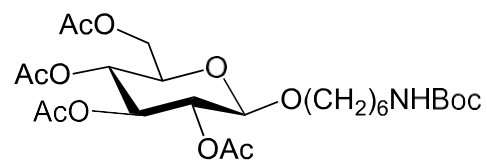

**8**,  $^1\text{H}$  NMR (600 MHz,  $\text{CDCl}_3$ )

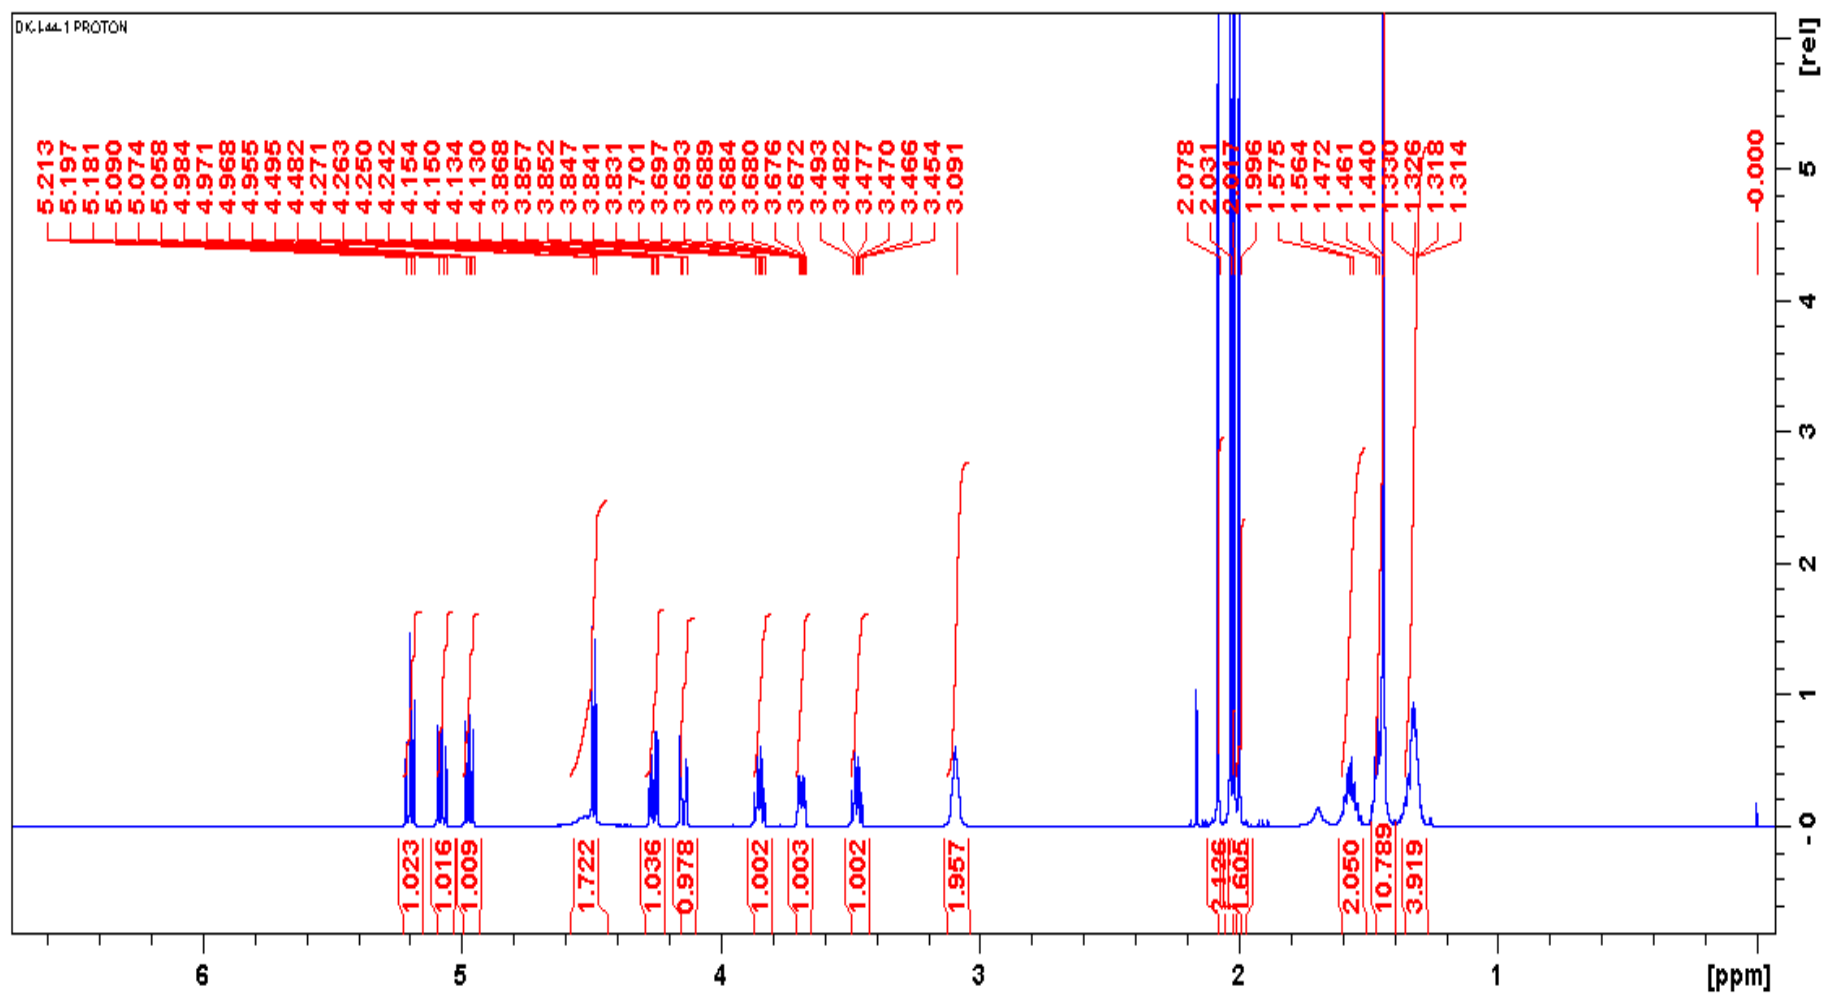

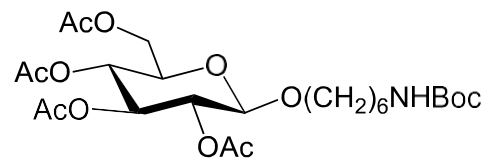

8,  $^{13}\text{C}$  NMR (150 MHz,  $\text{CDCl}_3$ )

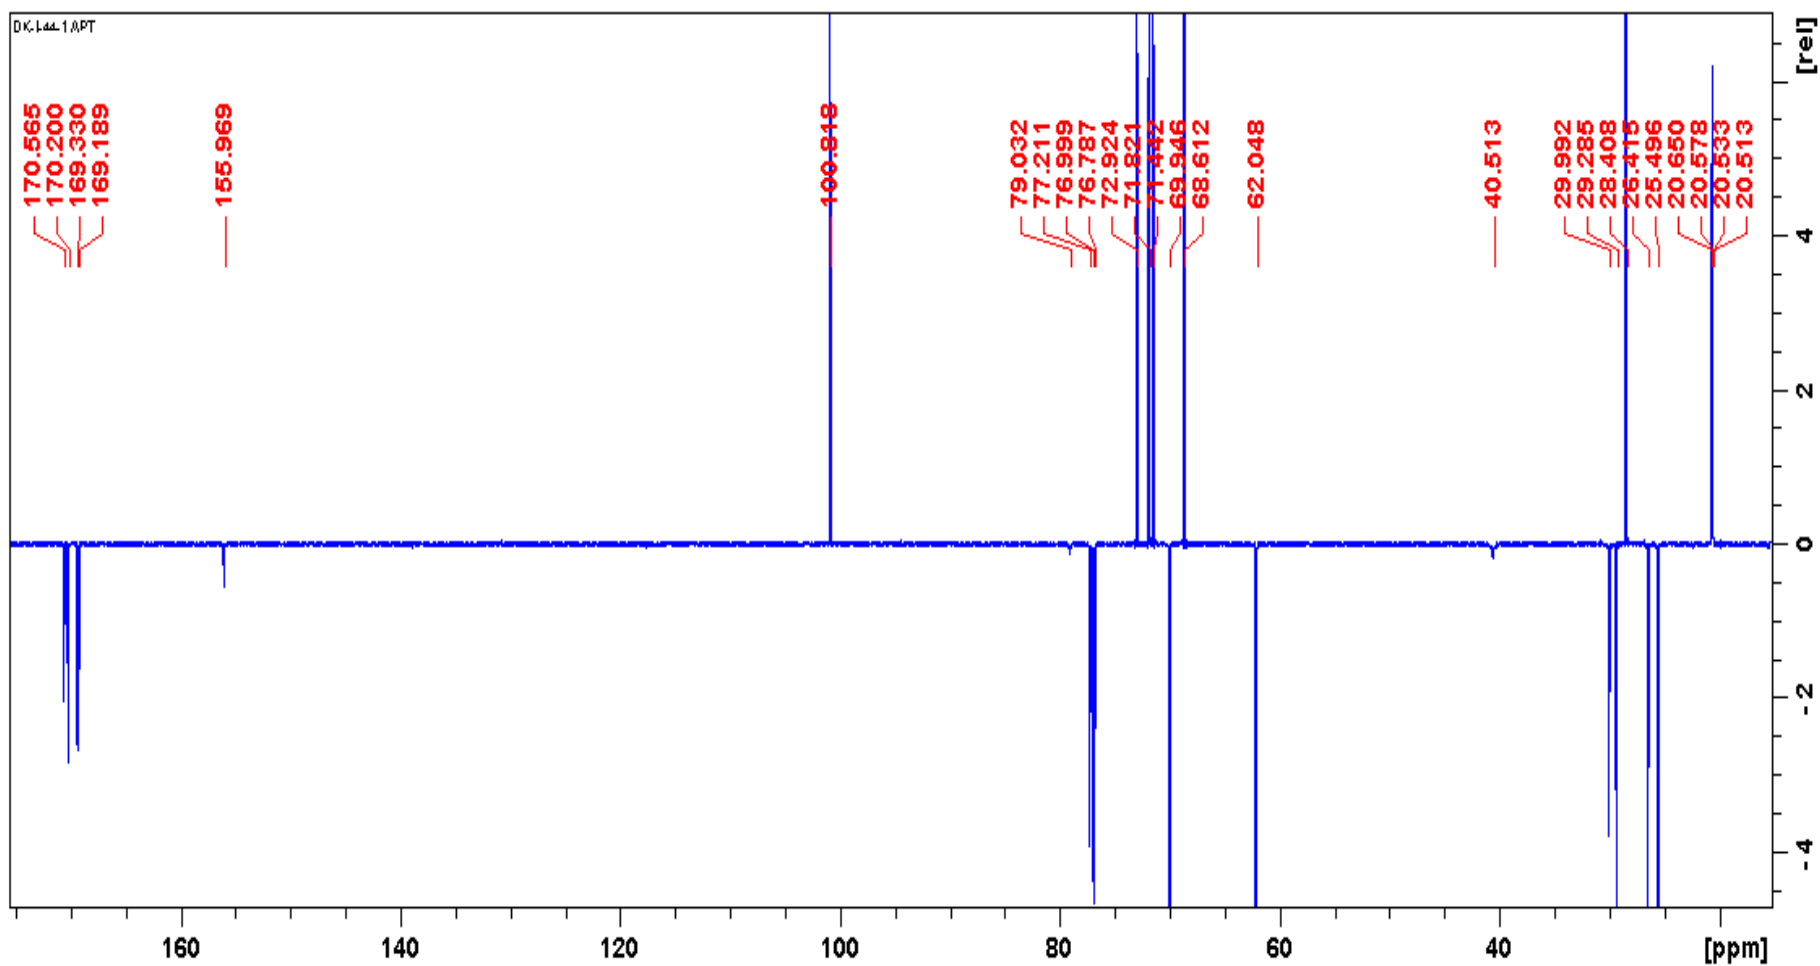

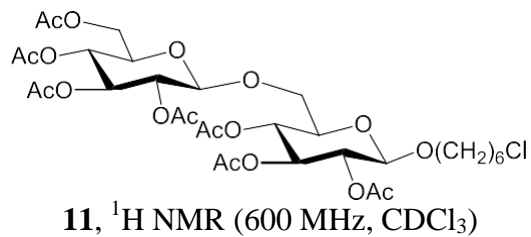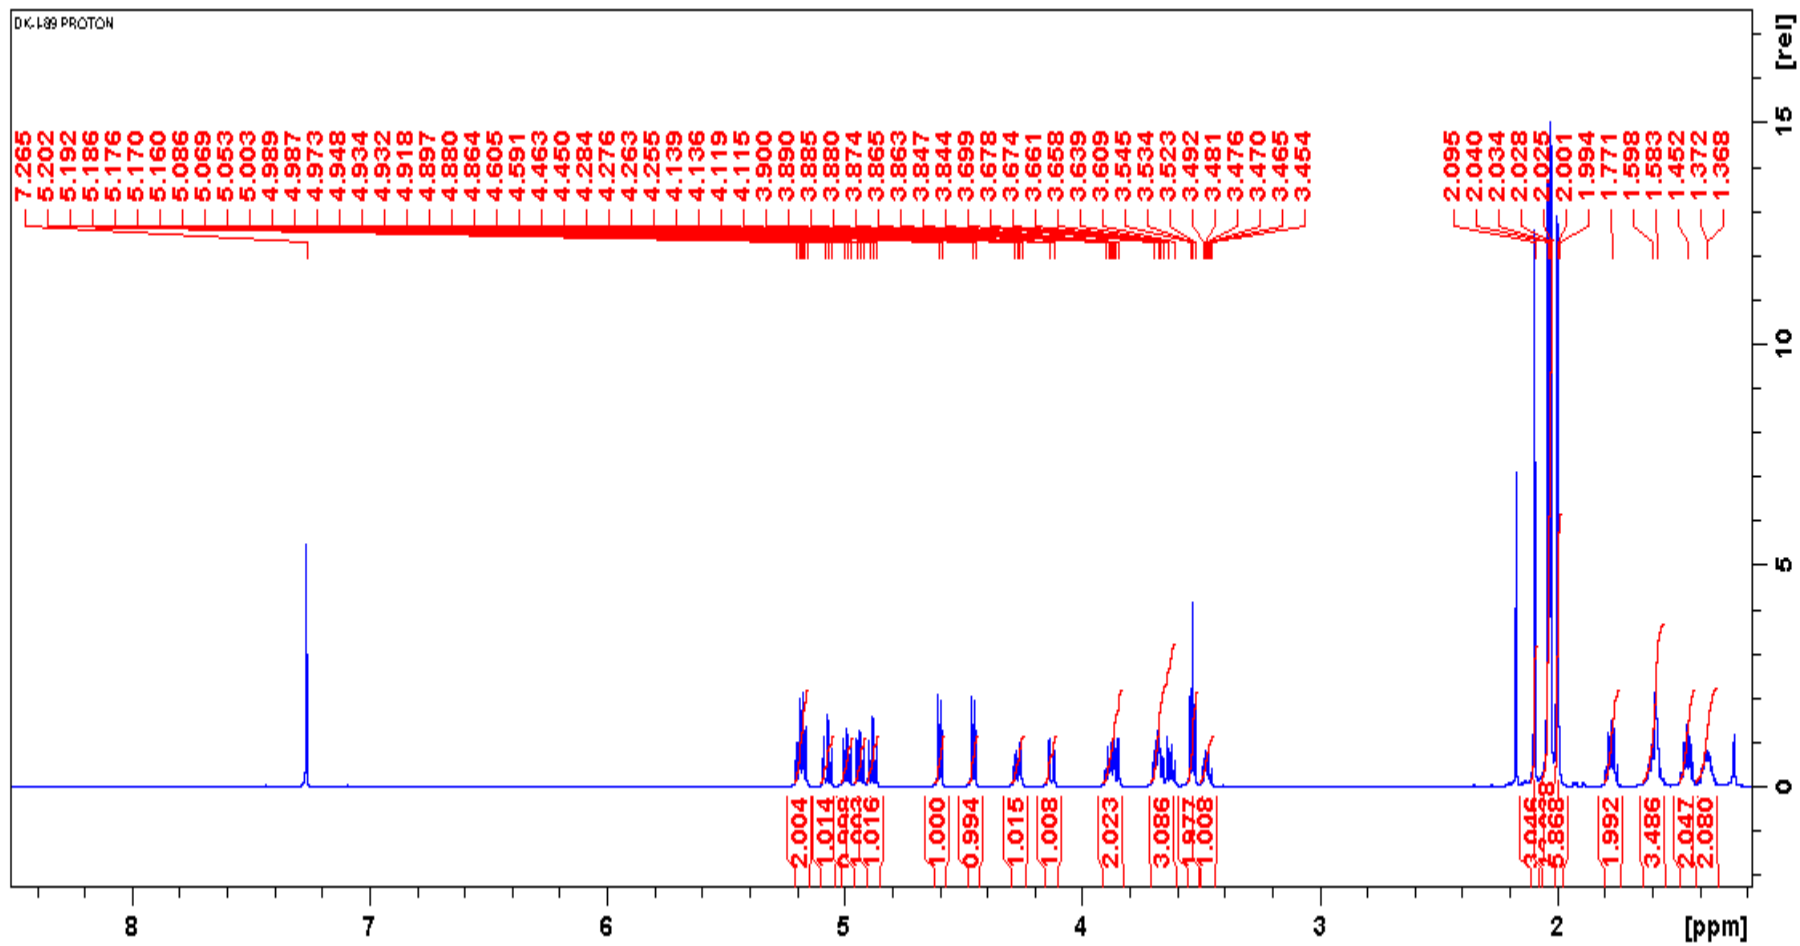

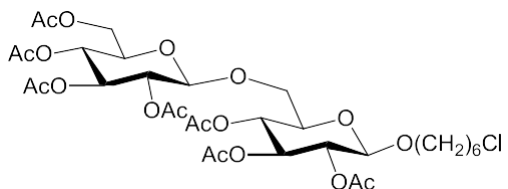

**11**, <sup>13</sup>C NMR (150 MHz, CDCl<sub>3</sub>)

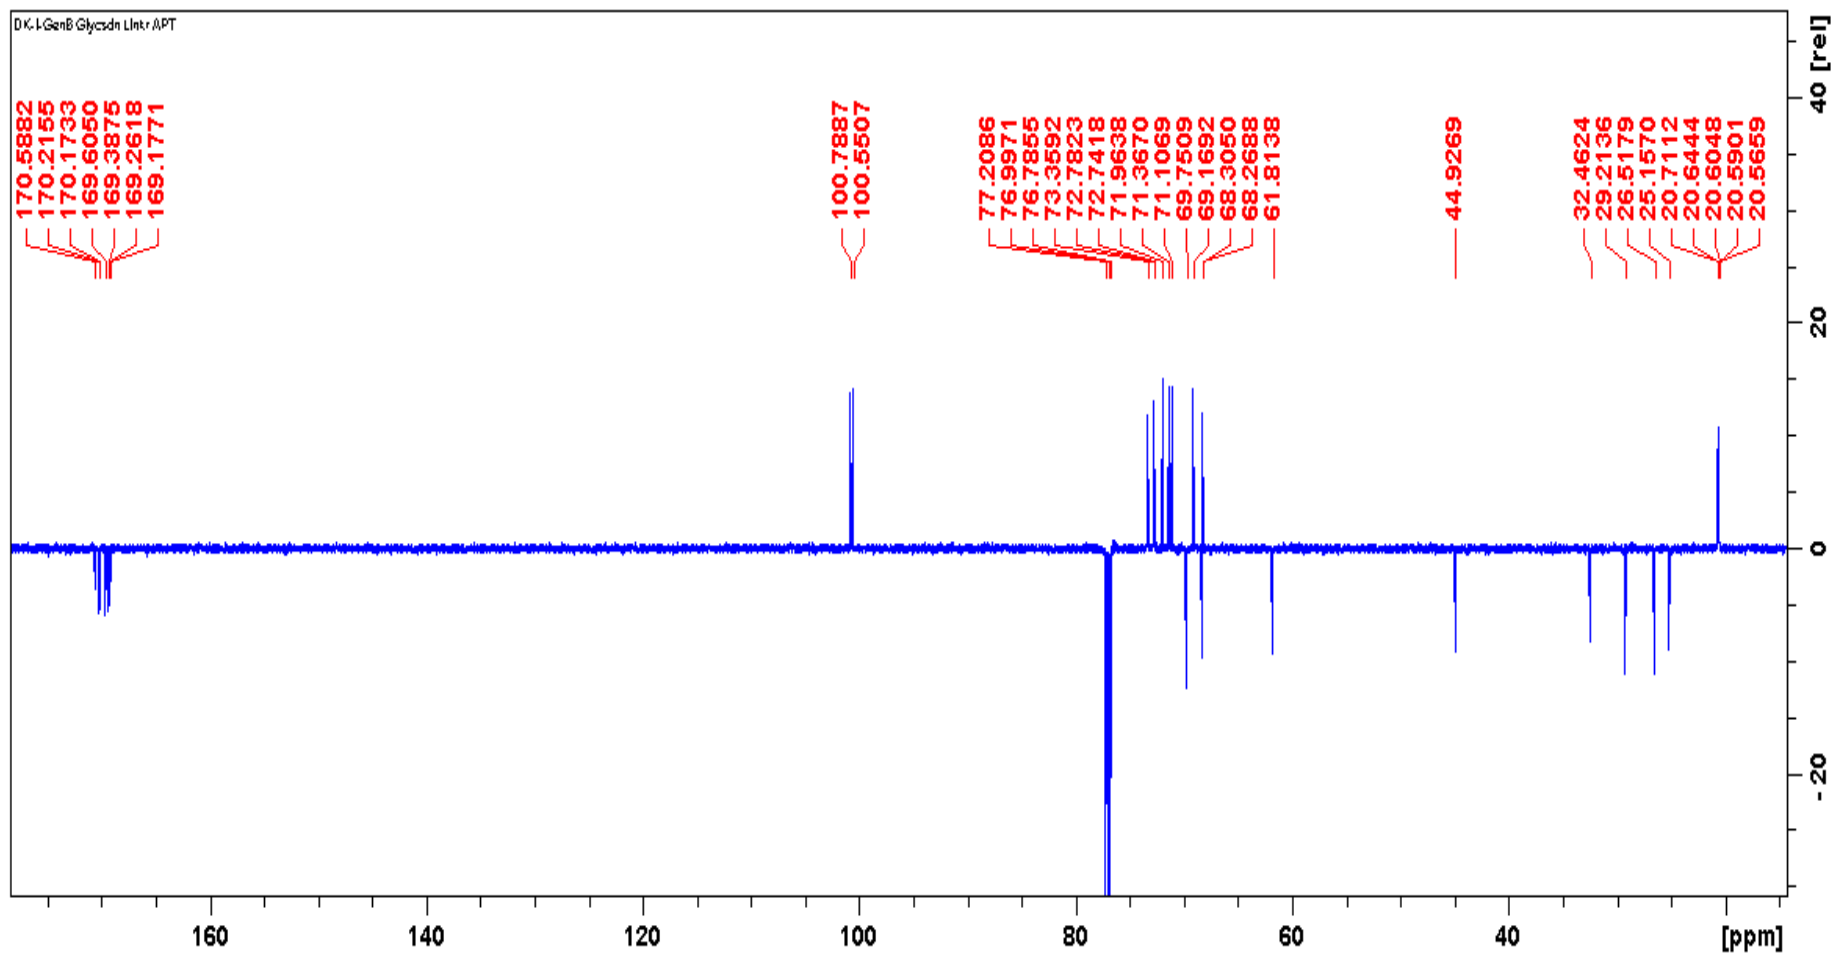

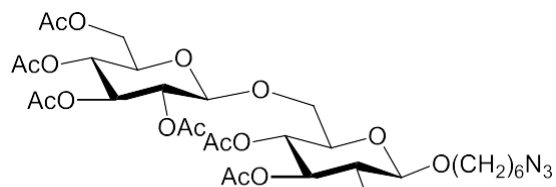

12, <sup>1</sup>H NMR (600 MHz, CDCl<sub>3</sub>)

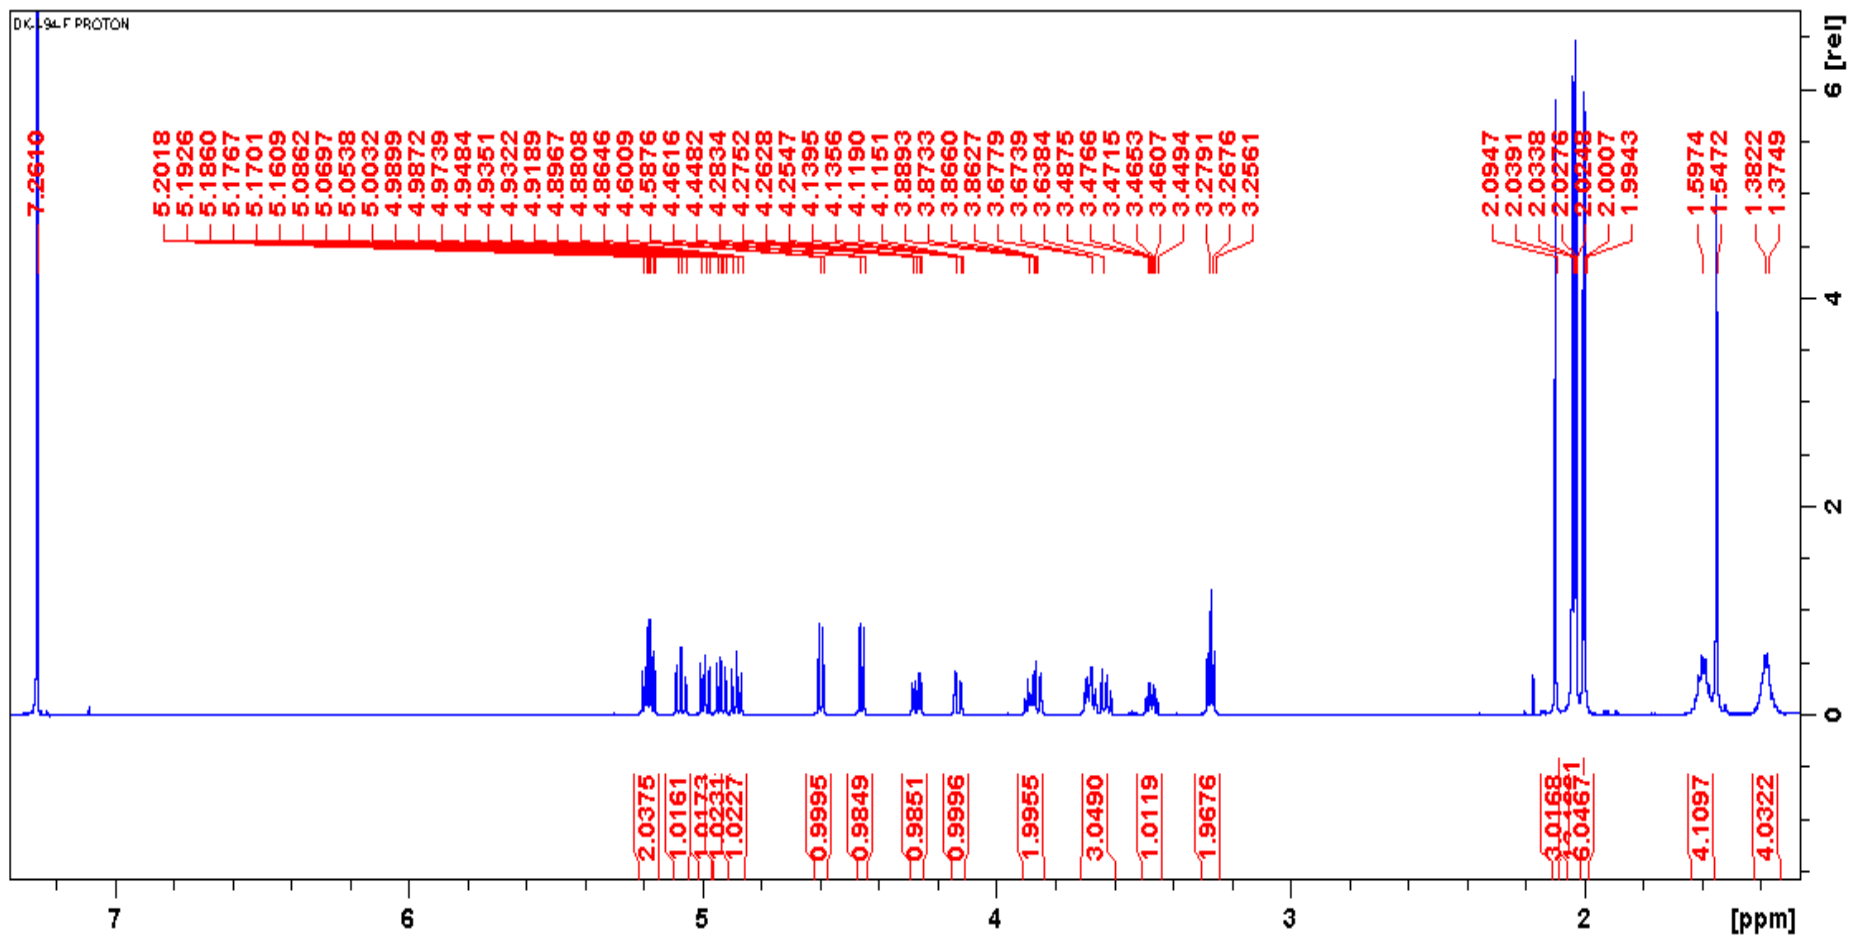



12, <sup>1</sup>H NMR (150 MHz, CDCl<sub>3</sub>)

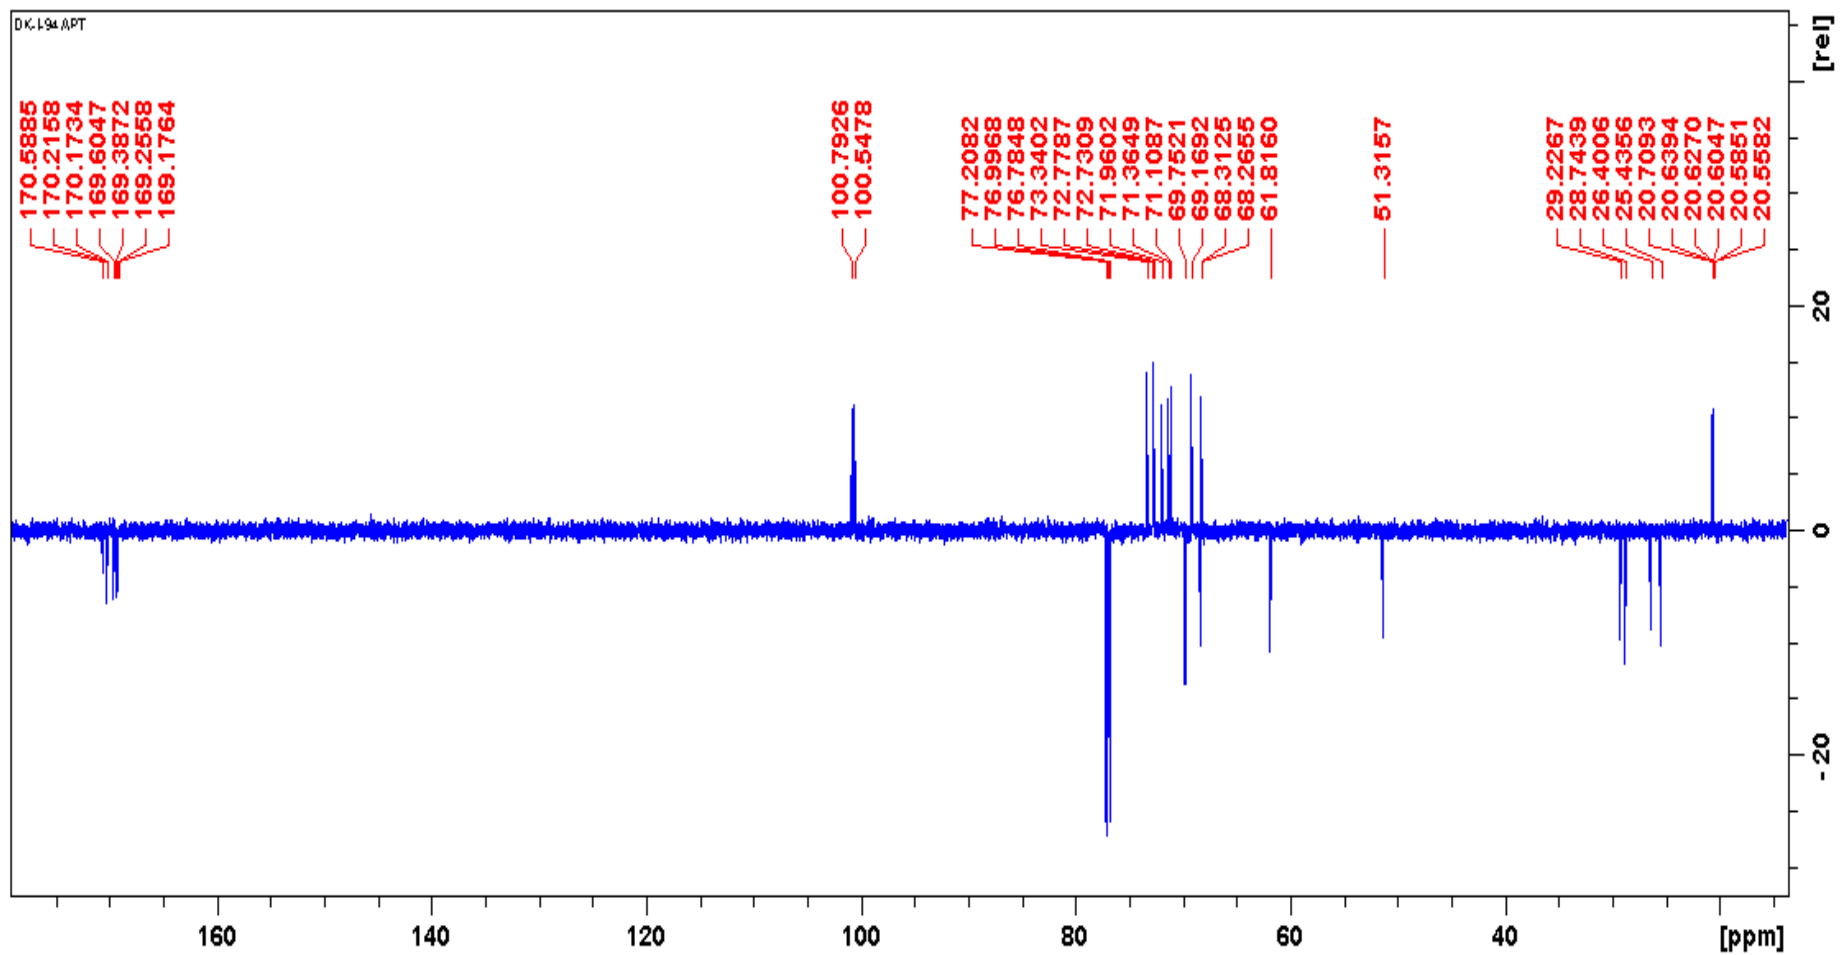

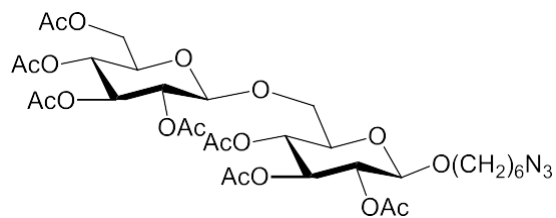

13,  $^1\text{H}$  NMR (600 MHz, MeOD)

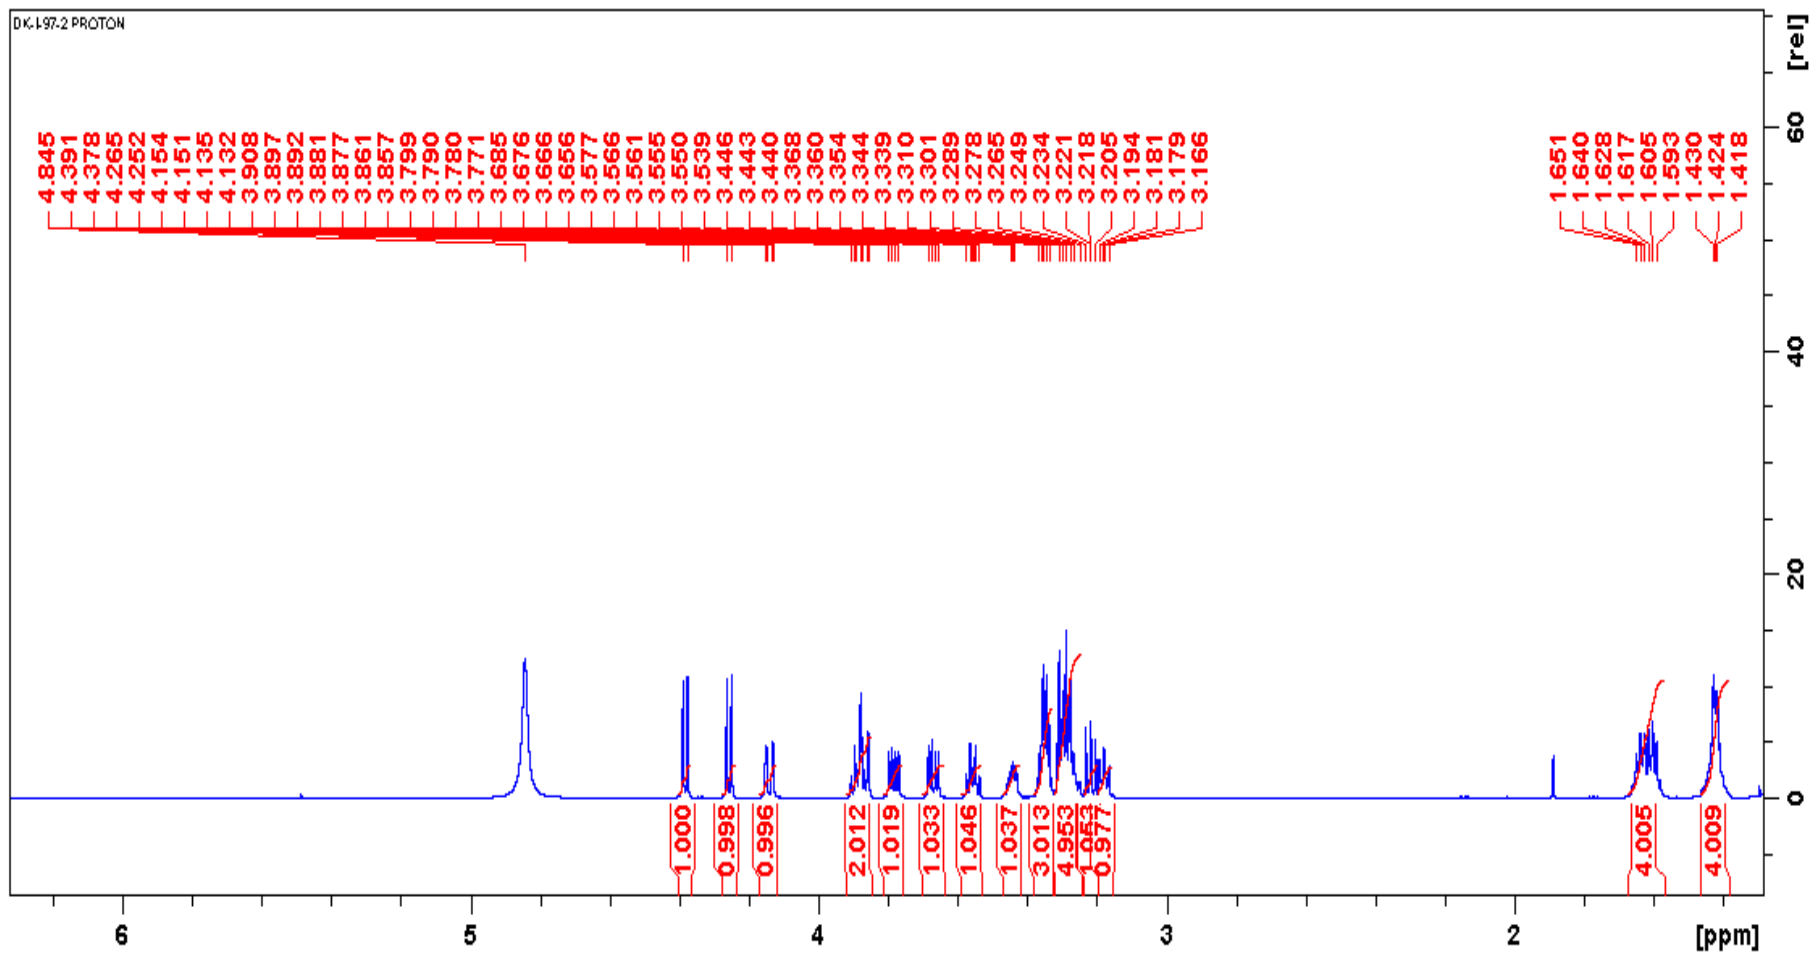





**13**,  $^{13}\text{C}$  NMR (150 MHz, MeOD)

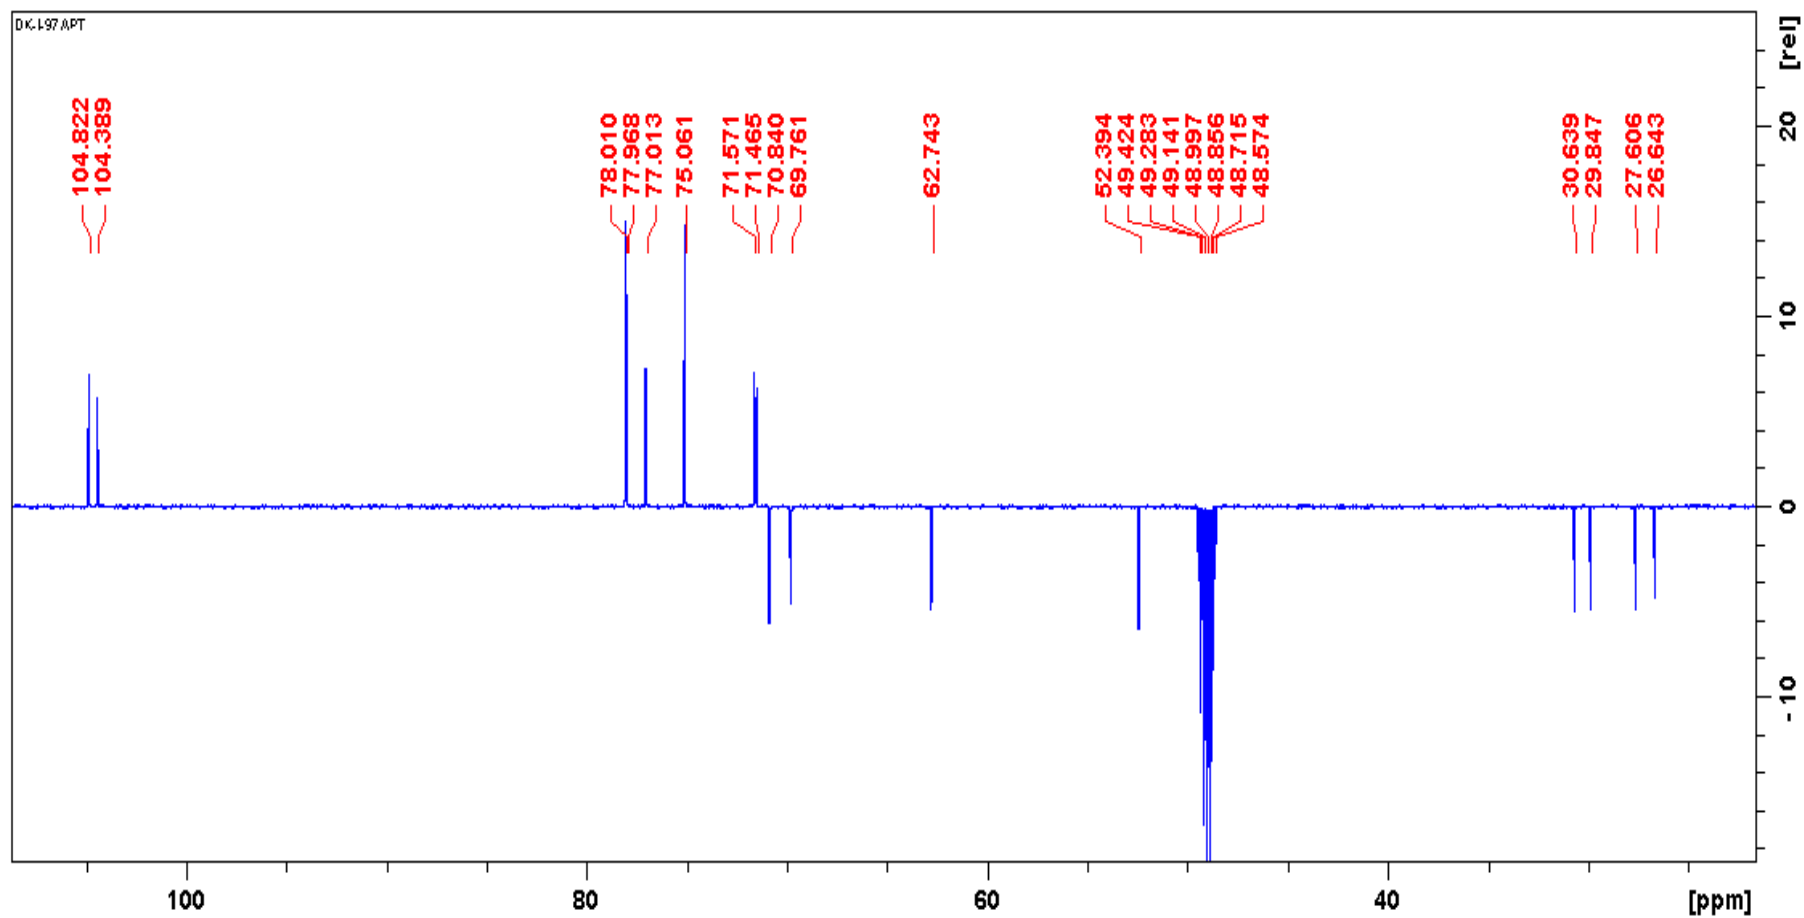

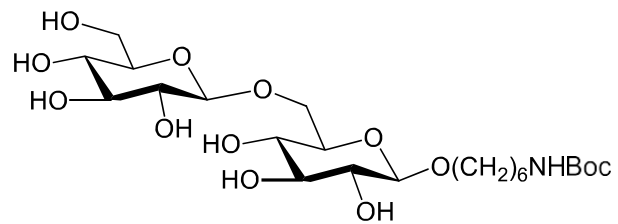

16,  $^1\text{H}$  NMR (600 MHz, MeOD)

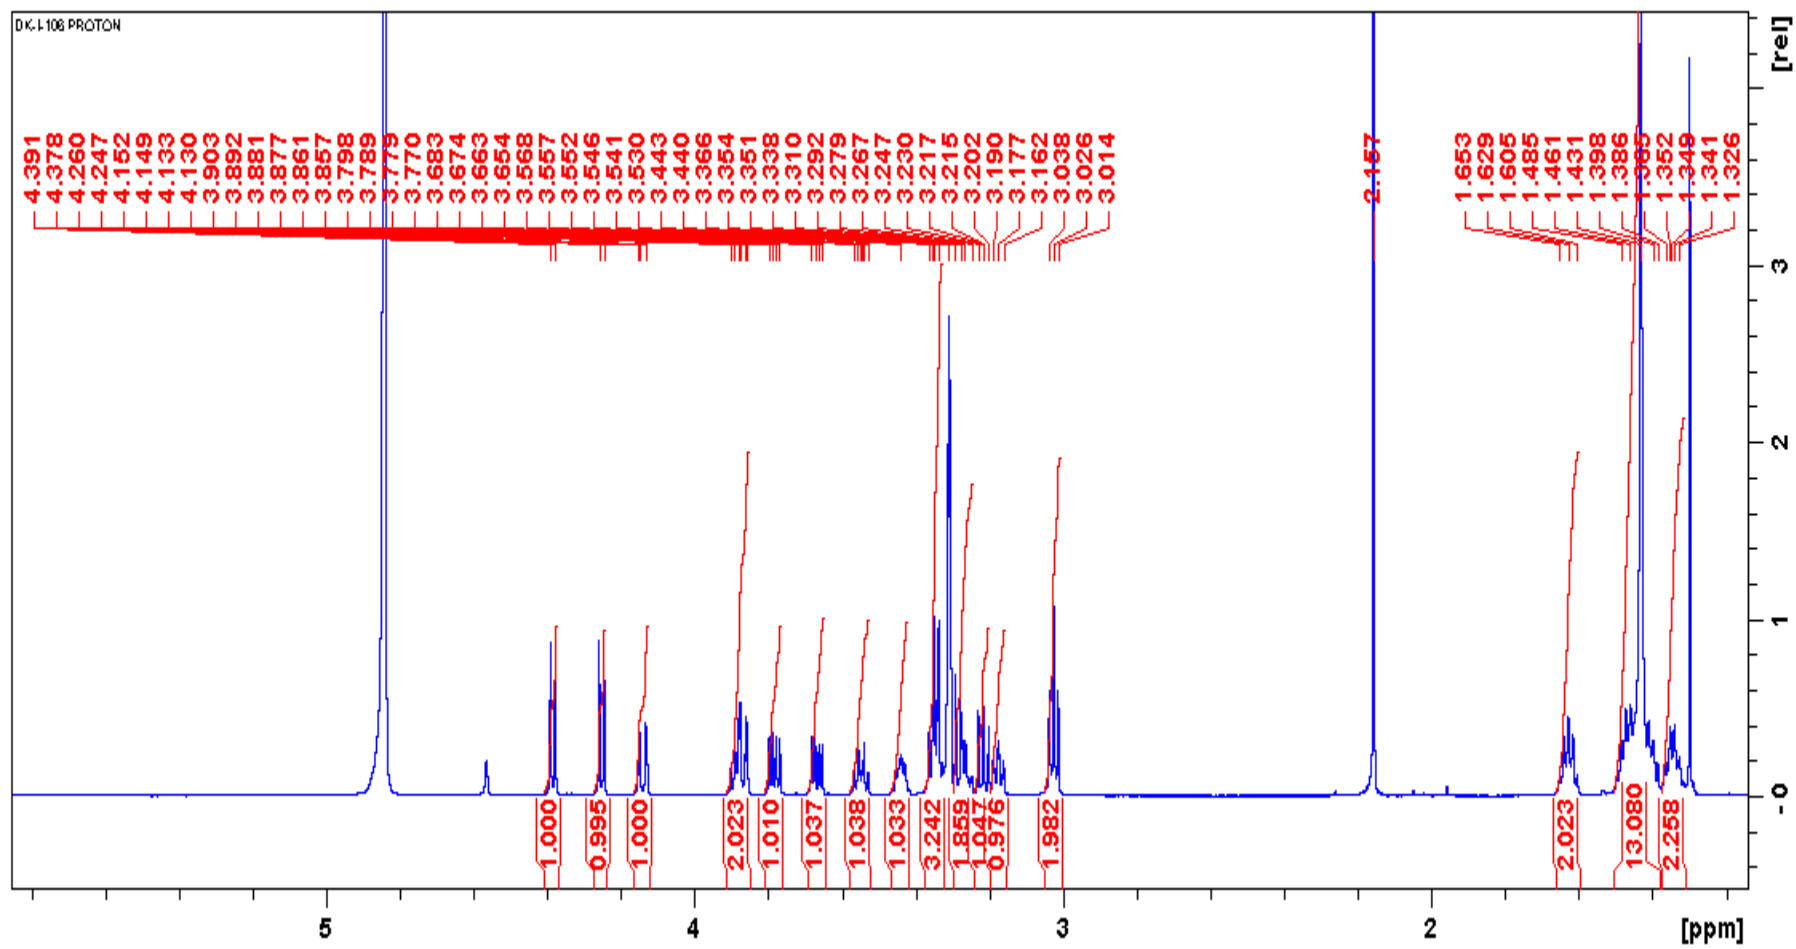



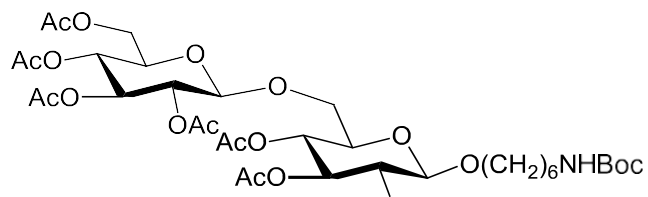

17,  $^1\text{H}$  NMR (600 MHz,  $\text{CDCl}_3$ )

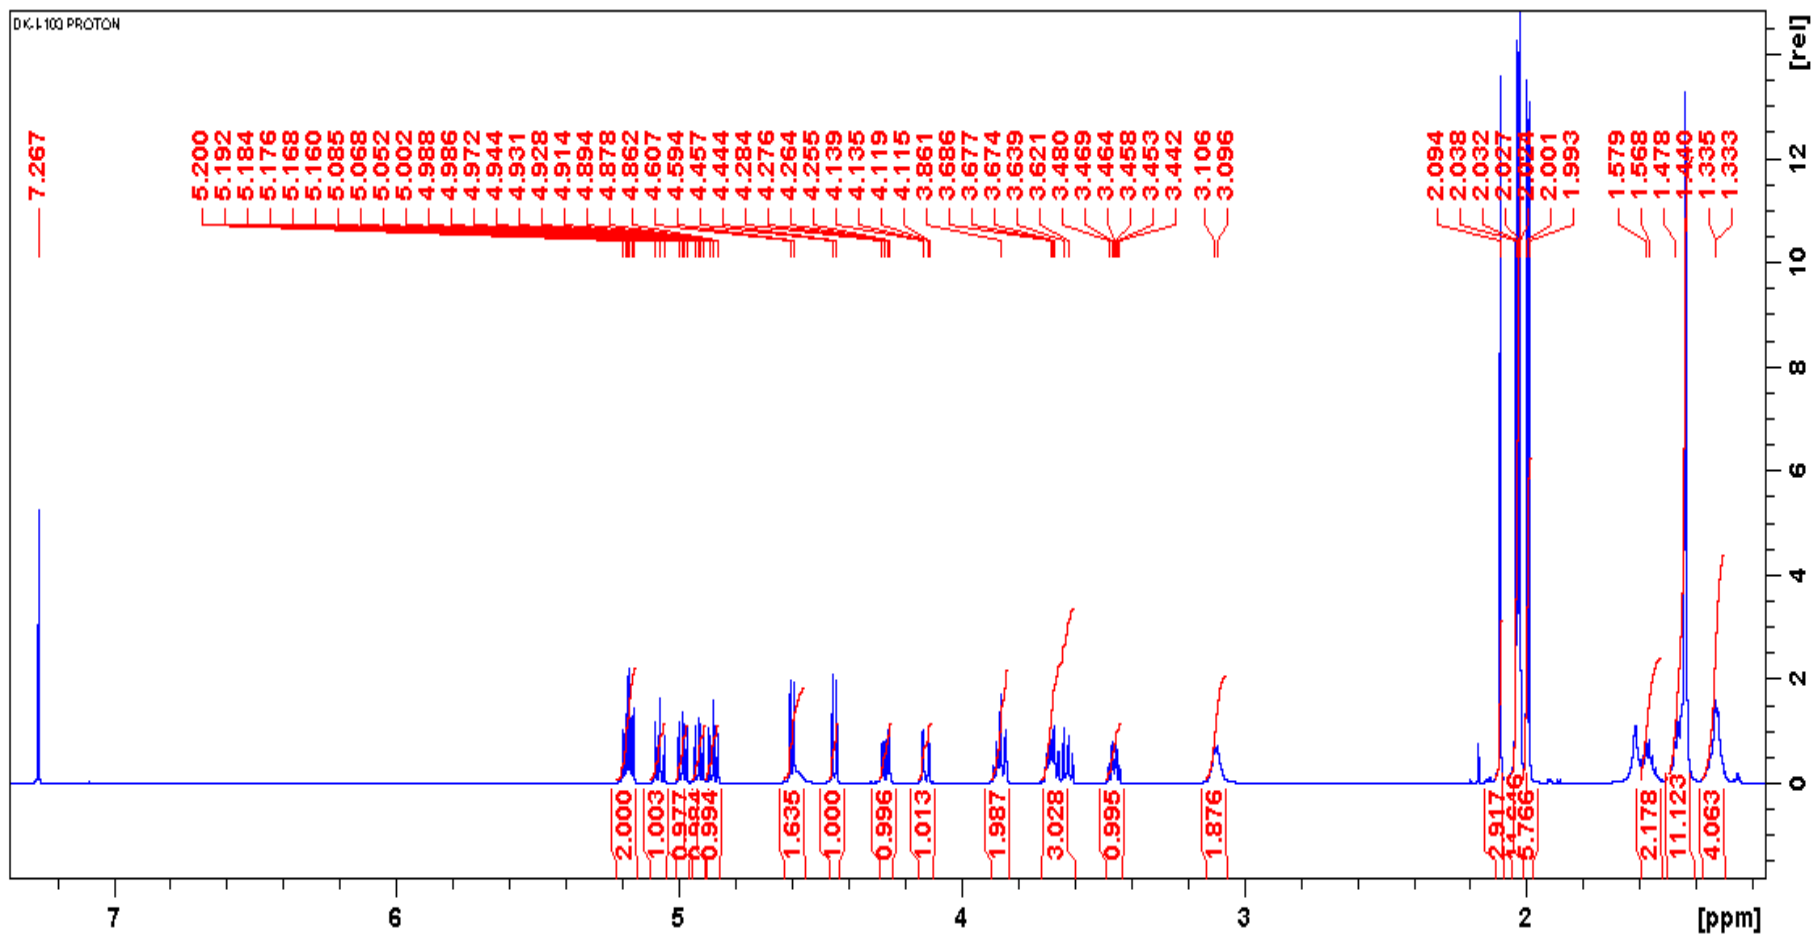

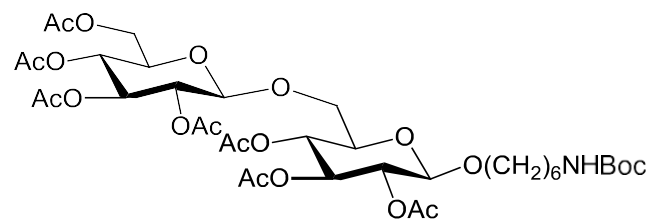

**17**, <sup>13</sup>C NMR (150 MHz, CDCl<sub>3</sub>)

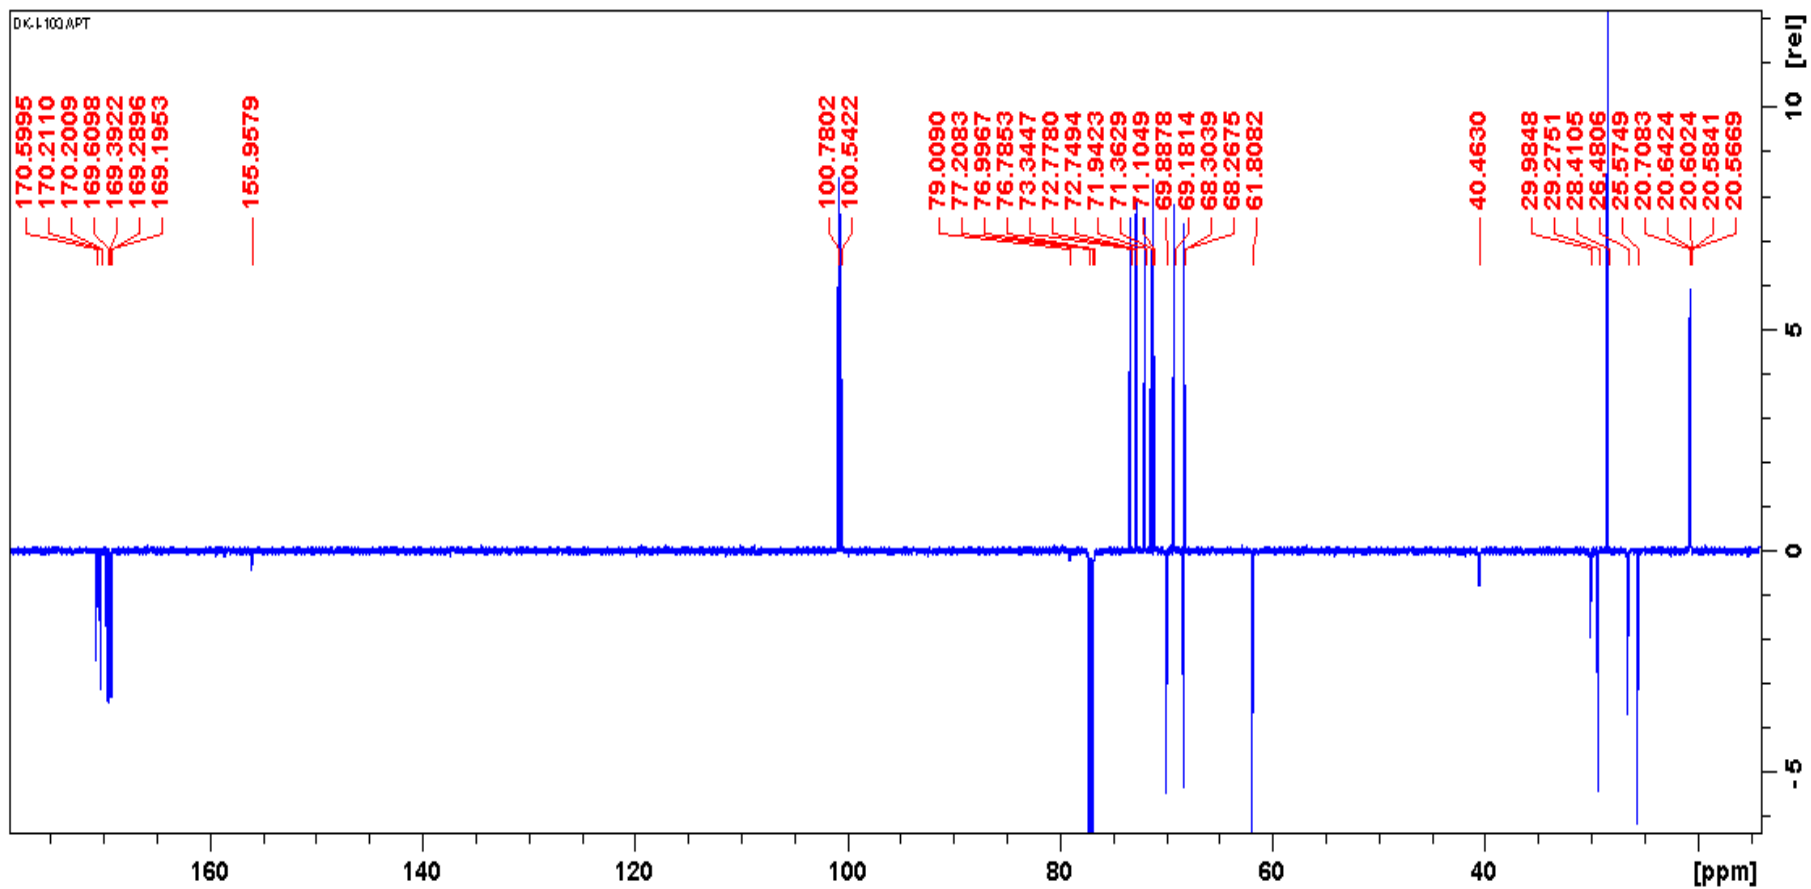

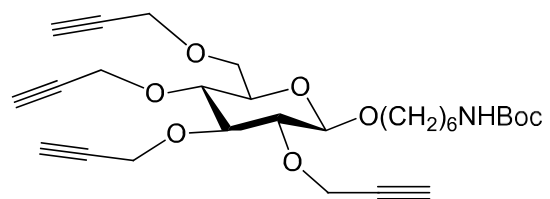

19,  $^1\text{H}$  NMR (600 MHz,  $\text{CDCl}_3$ )

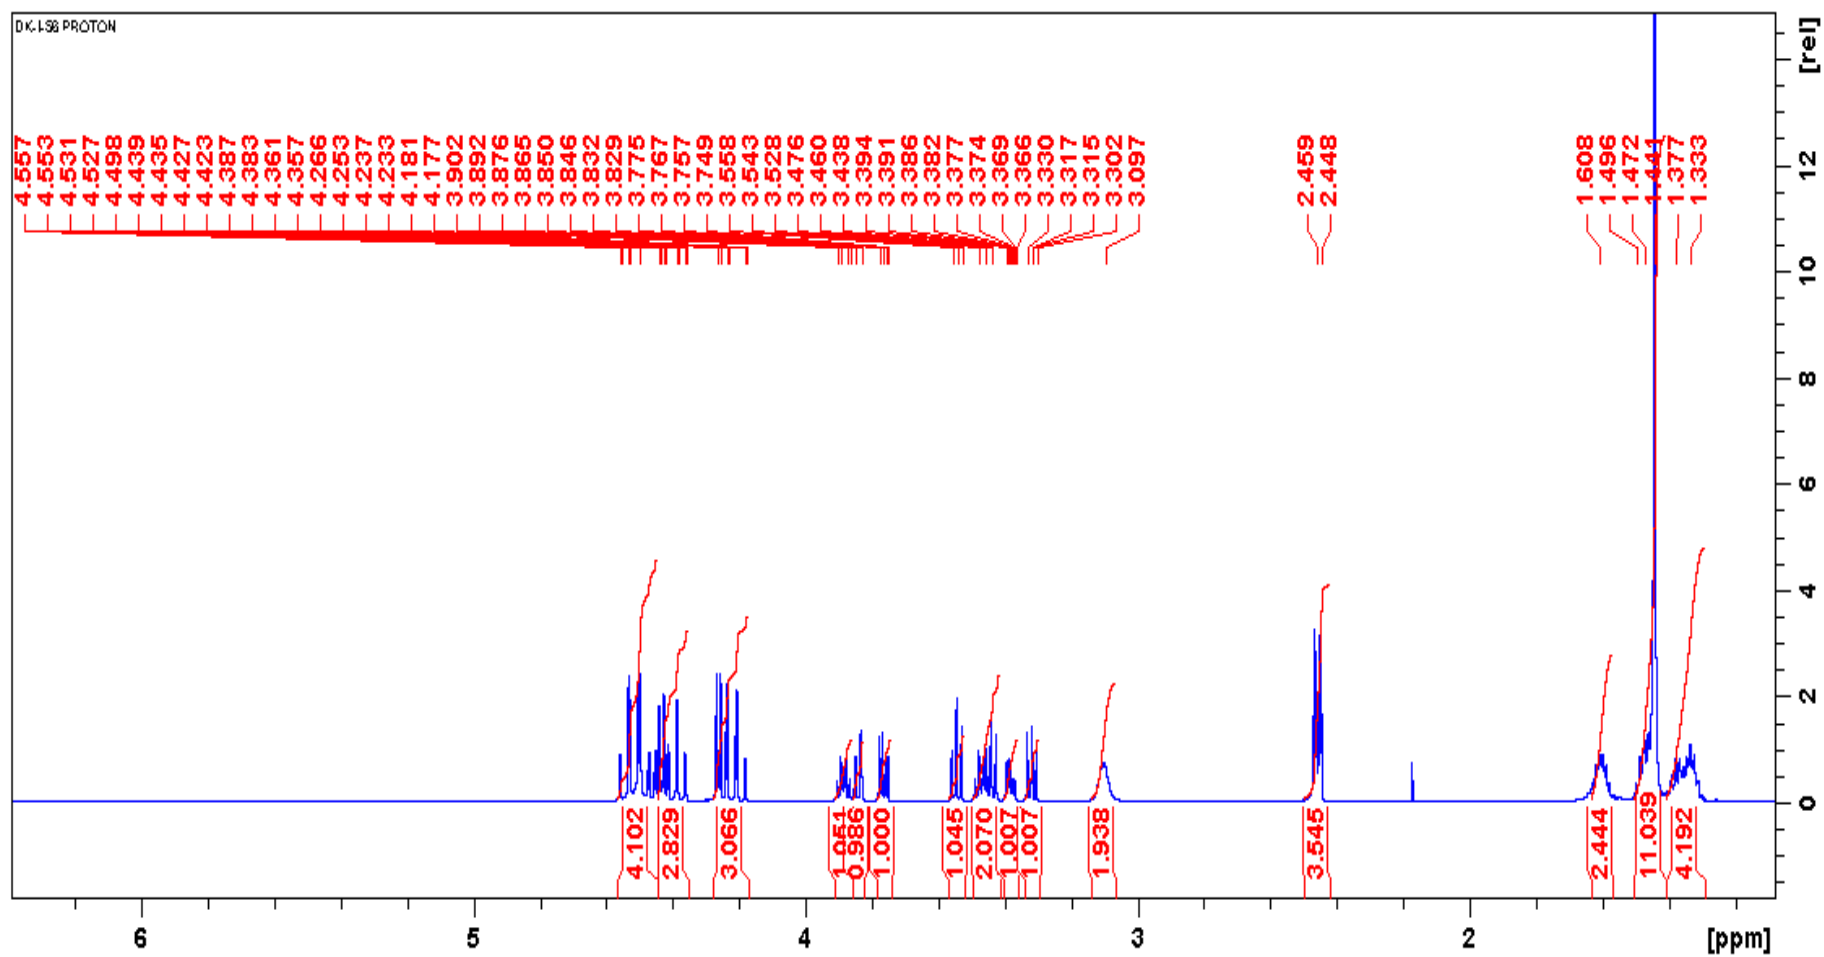



**19**, <sup>13</sup>C NMR (150 MHz, CDCl<sub>3</sub>)

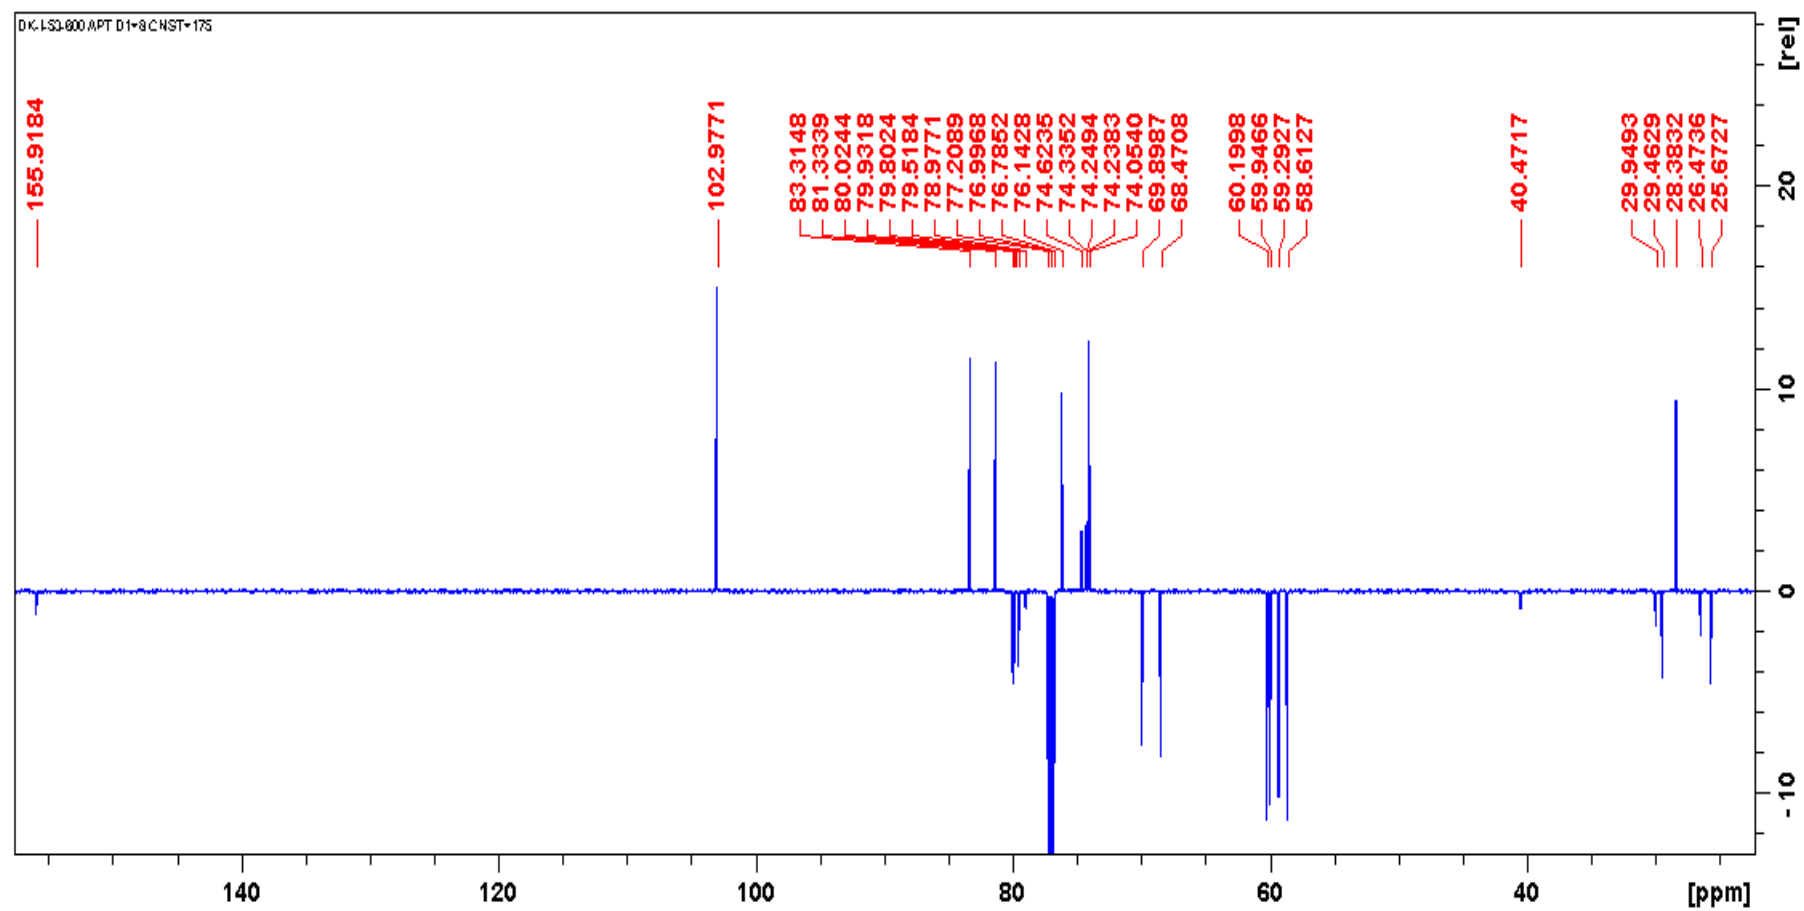

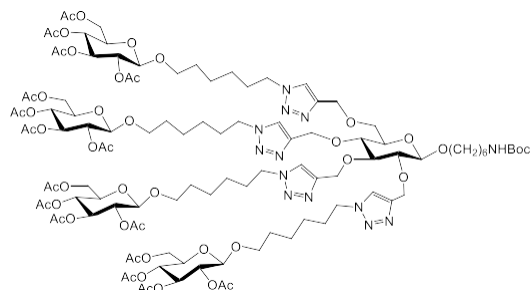20,  $^1\text{H}$  NMR (600 MHz,  $\text{CDCl}_3$ )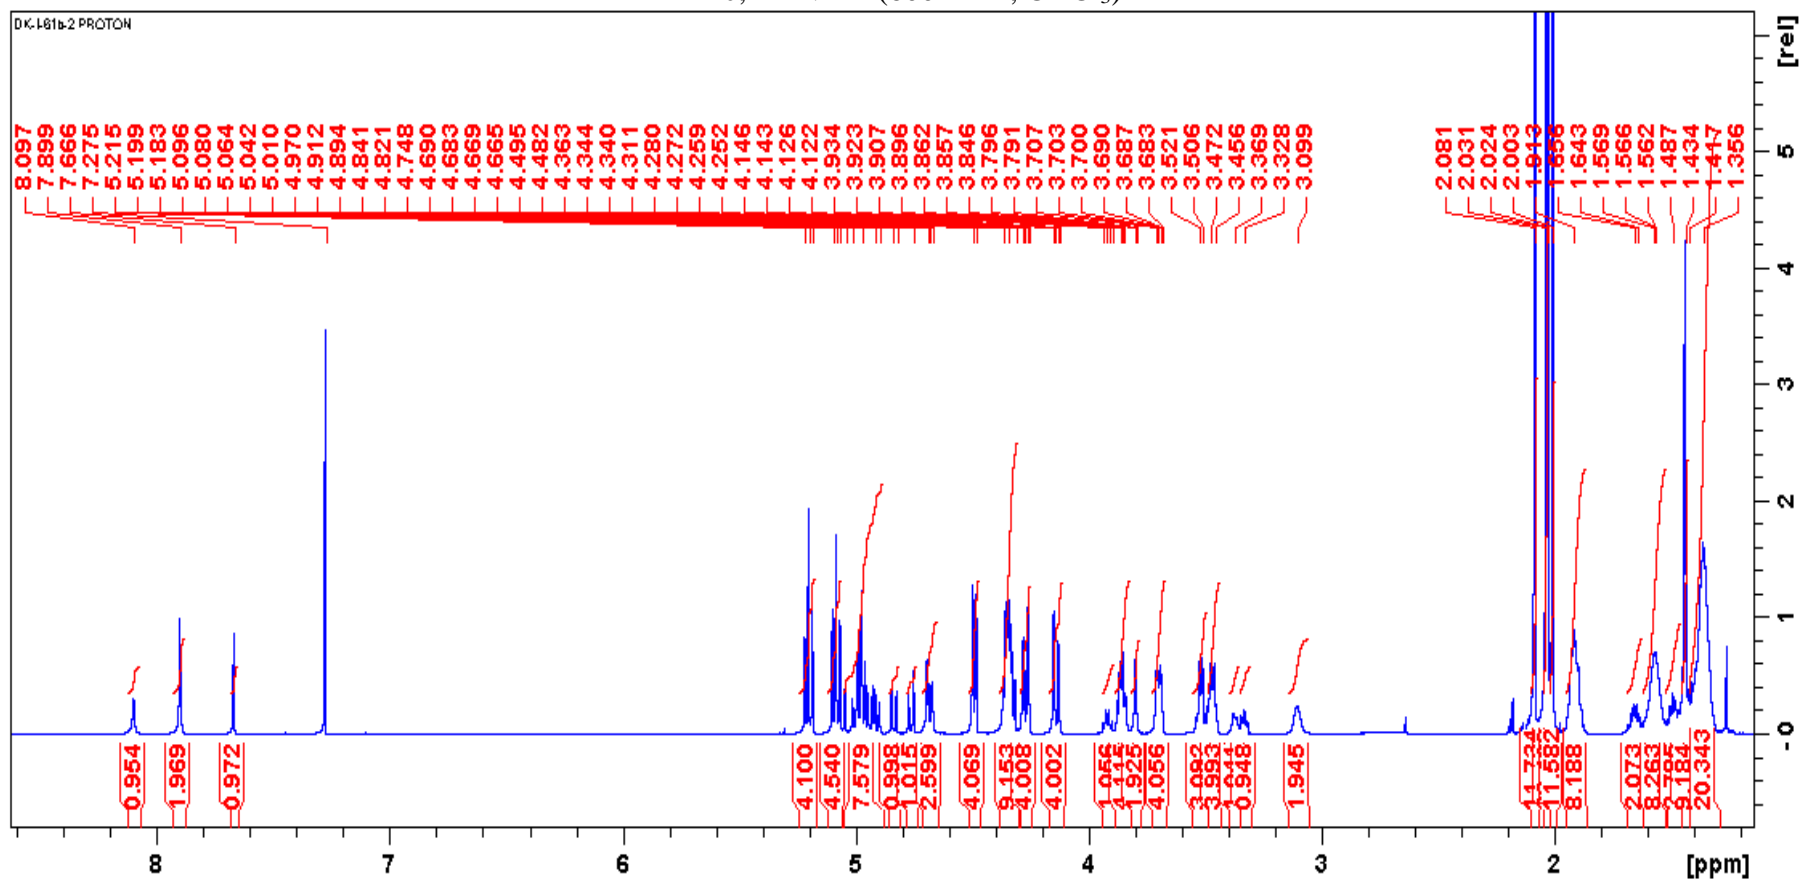



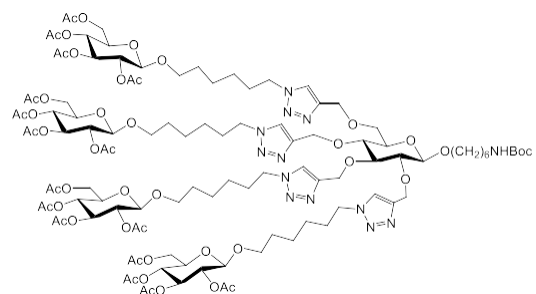

20, <sup>13</sup>C NMR (150 MHz, CDCl<sub>3</sub>)

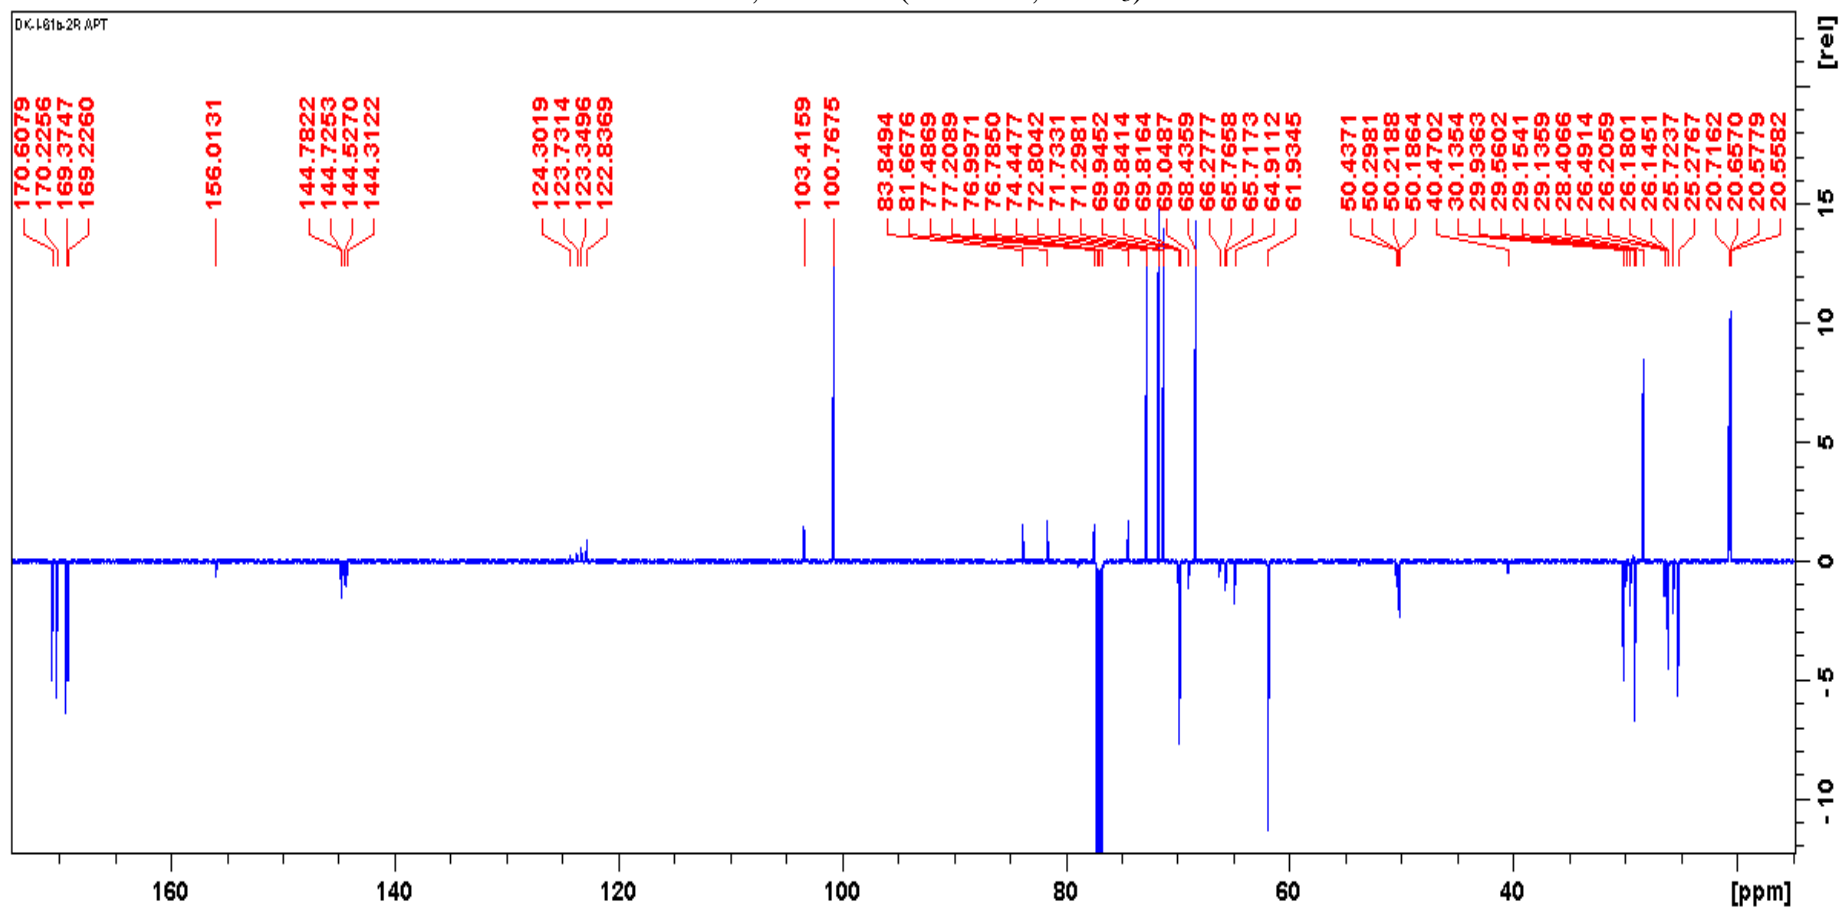

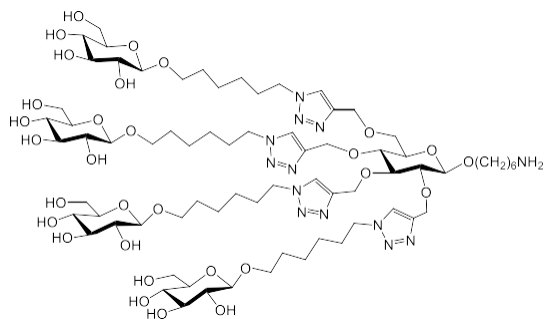21,  $^1\text{H}$  NMR (600 MHz,  $\text{D}_2\text{O}$ )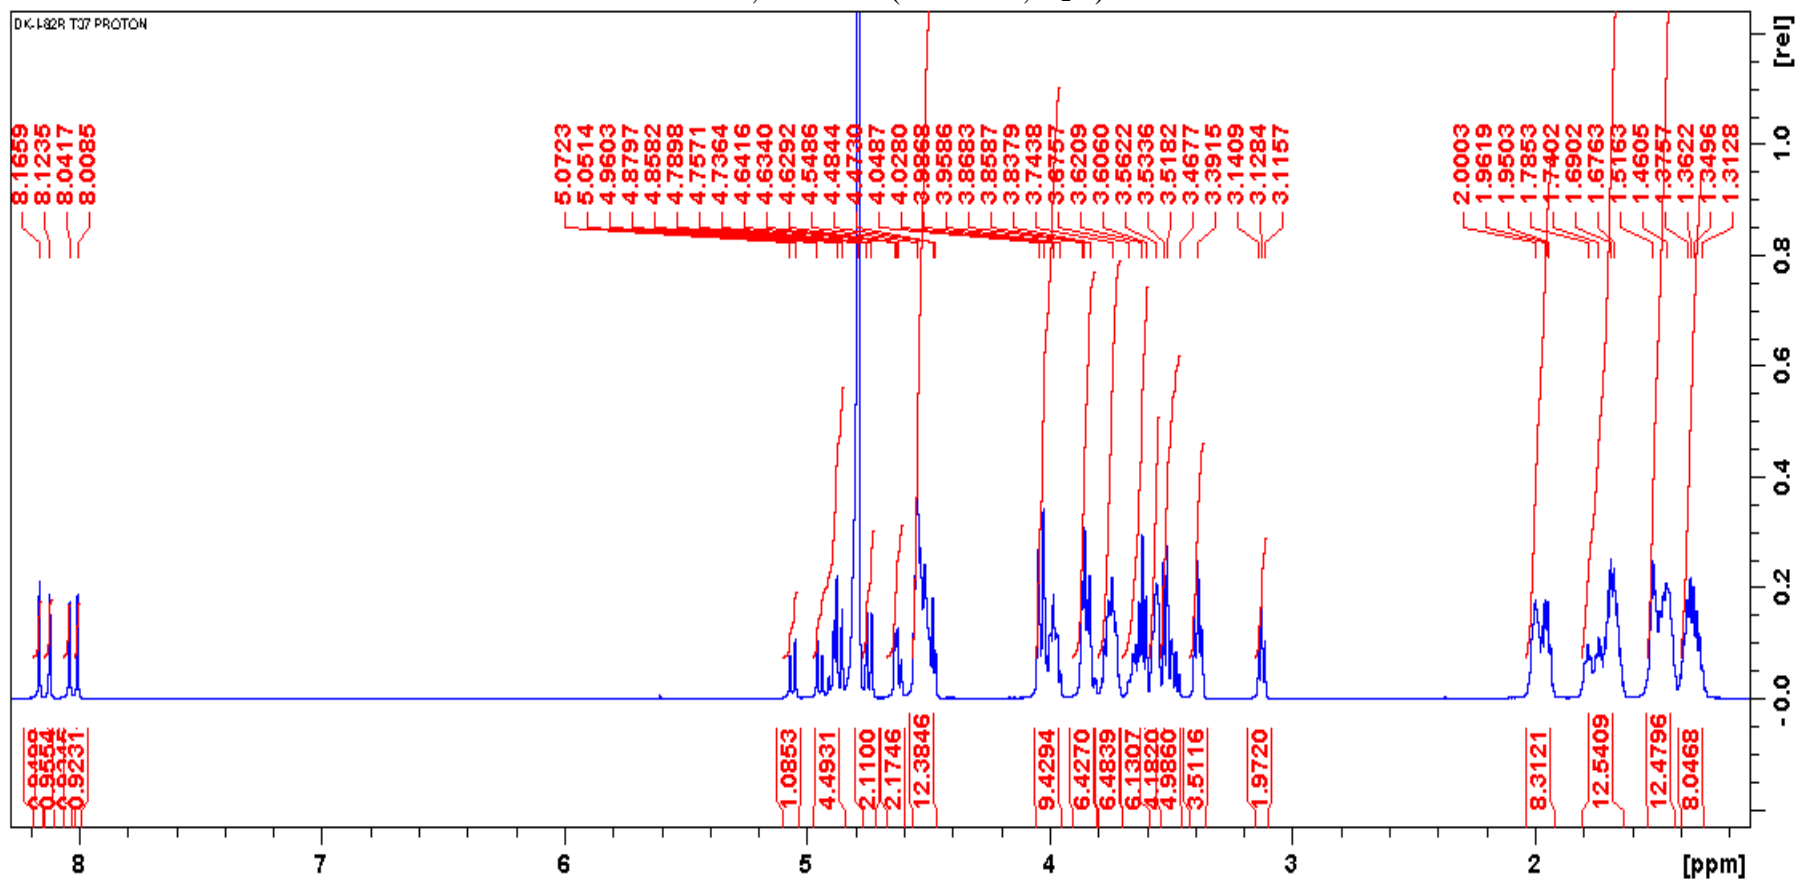

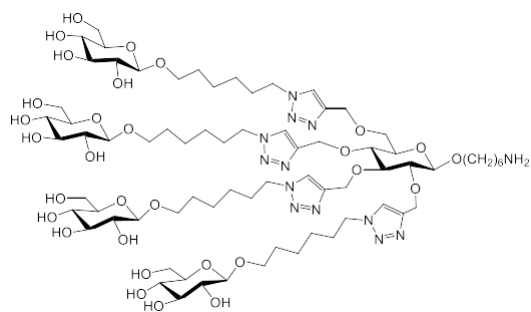**21**,  $^{13}\text{C}$  NMR (150 MHz,  $\text{D}_2\text{O}$ )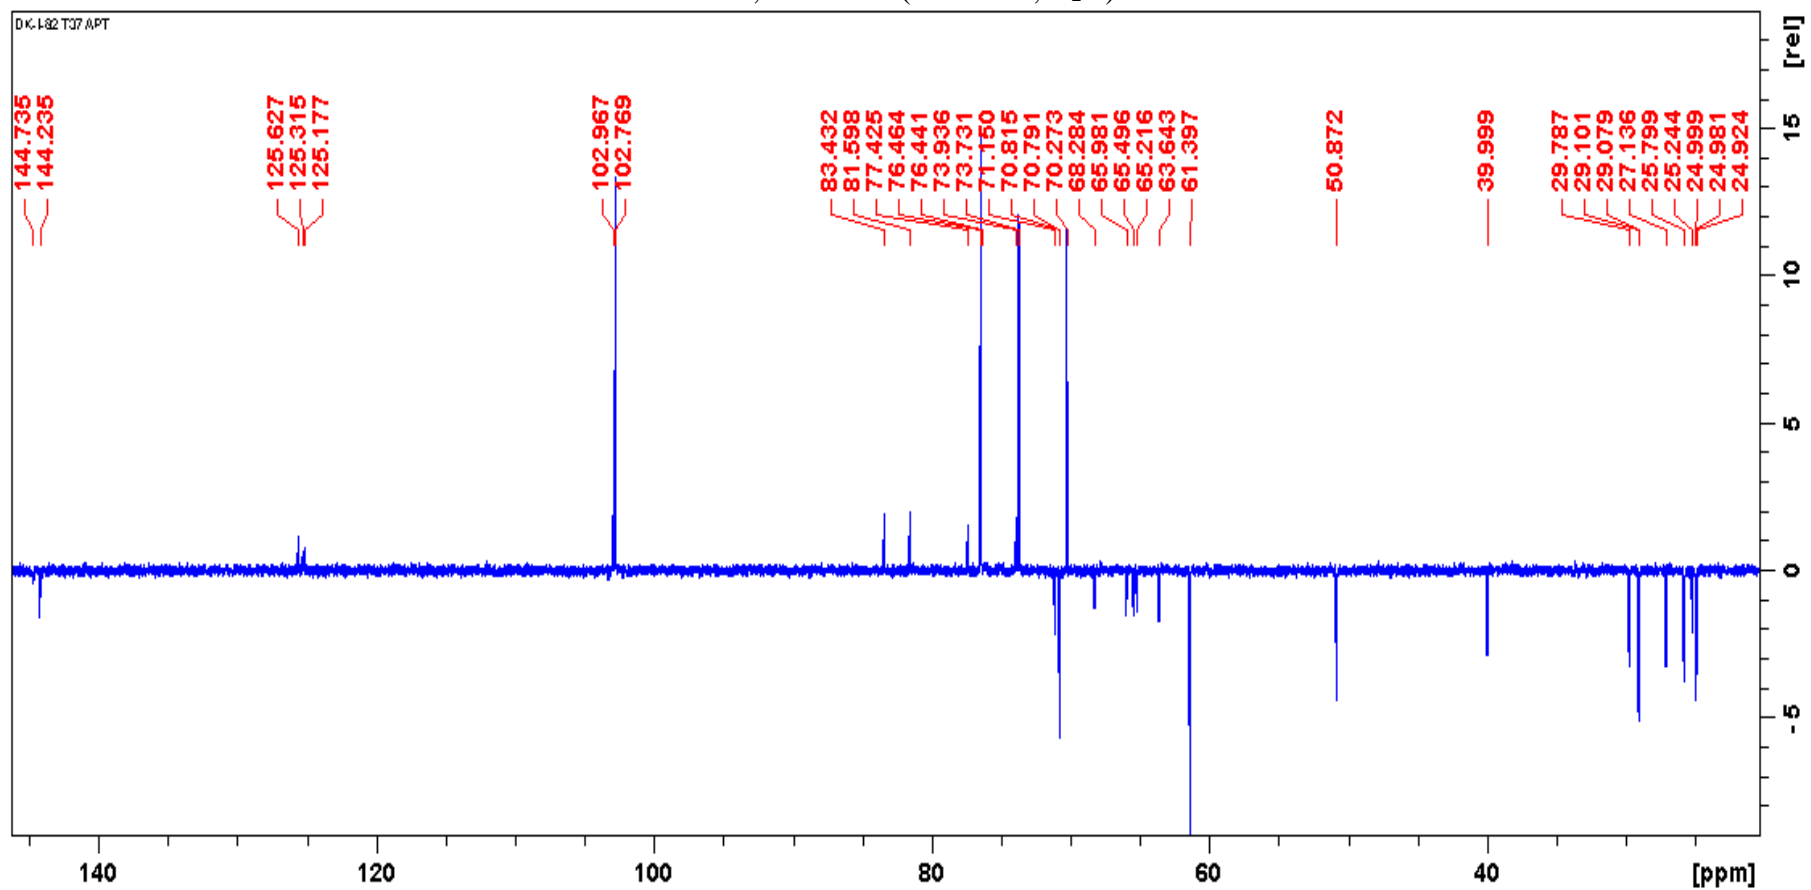

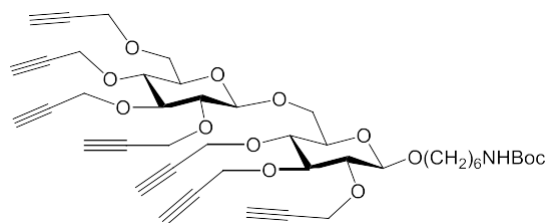22,  $^1\text{H}$  NMR (600 MHz,  $\text{CDCl}_3$ )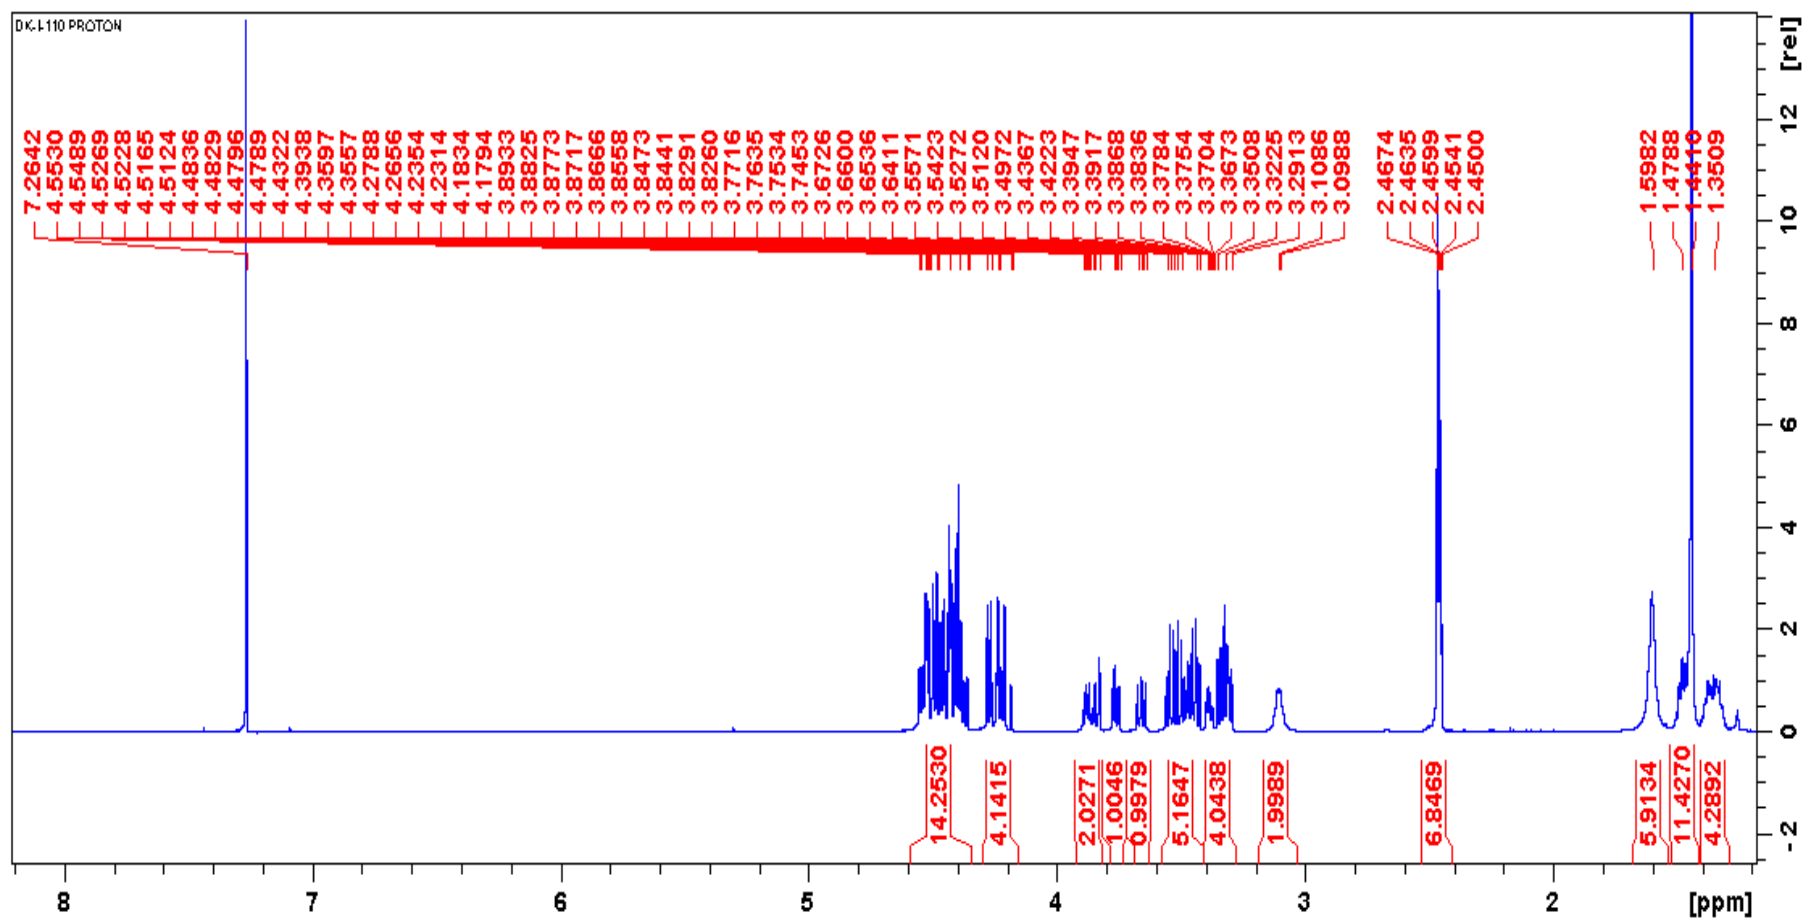

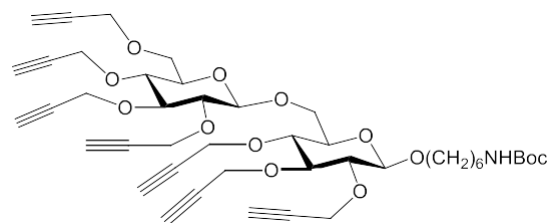

22,  $^{13}\text{C}$  NMR (150 MHz,  $\text{CDCl}_3$ )

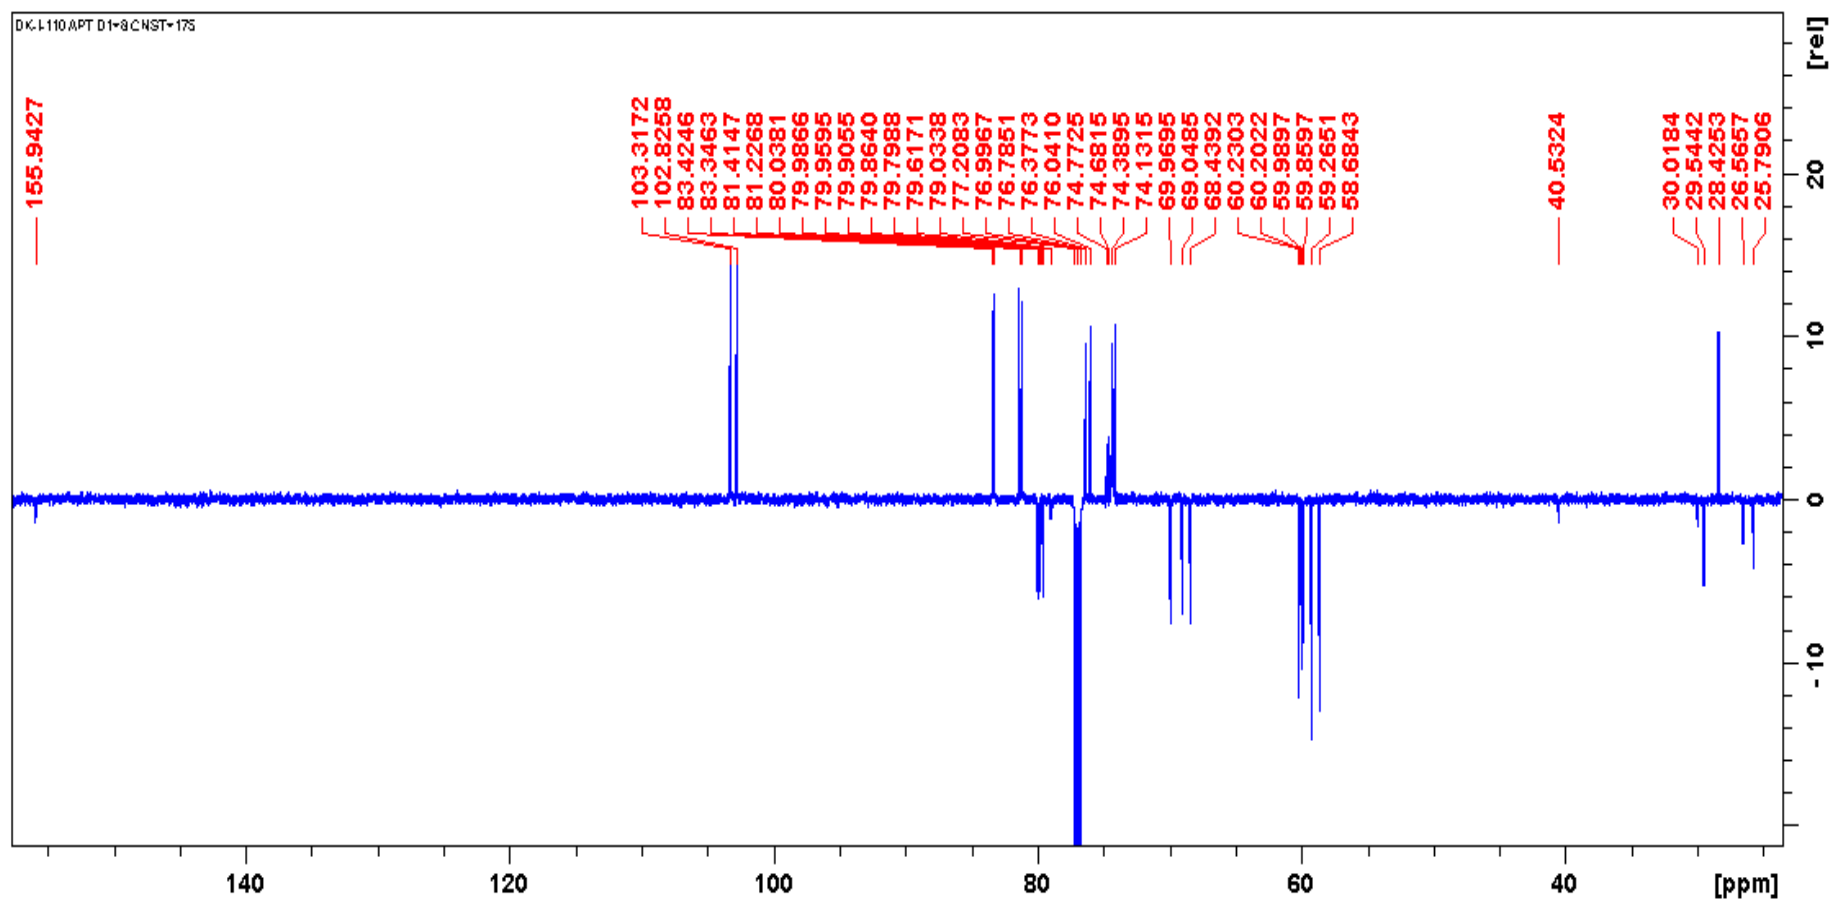

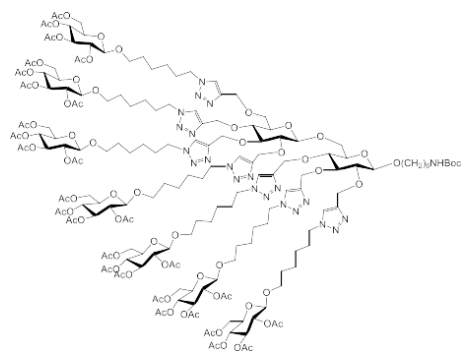

23,  $^1\text{H}$  NMR (600 MHz,  $\text{CDCl}_3$ )

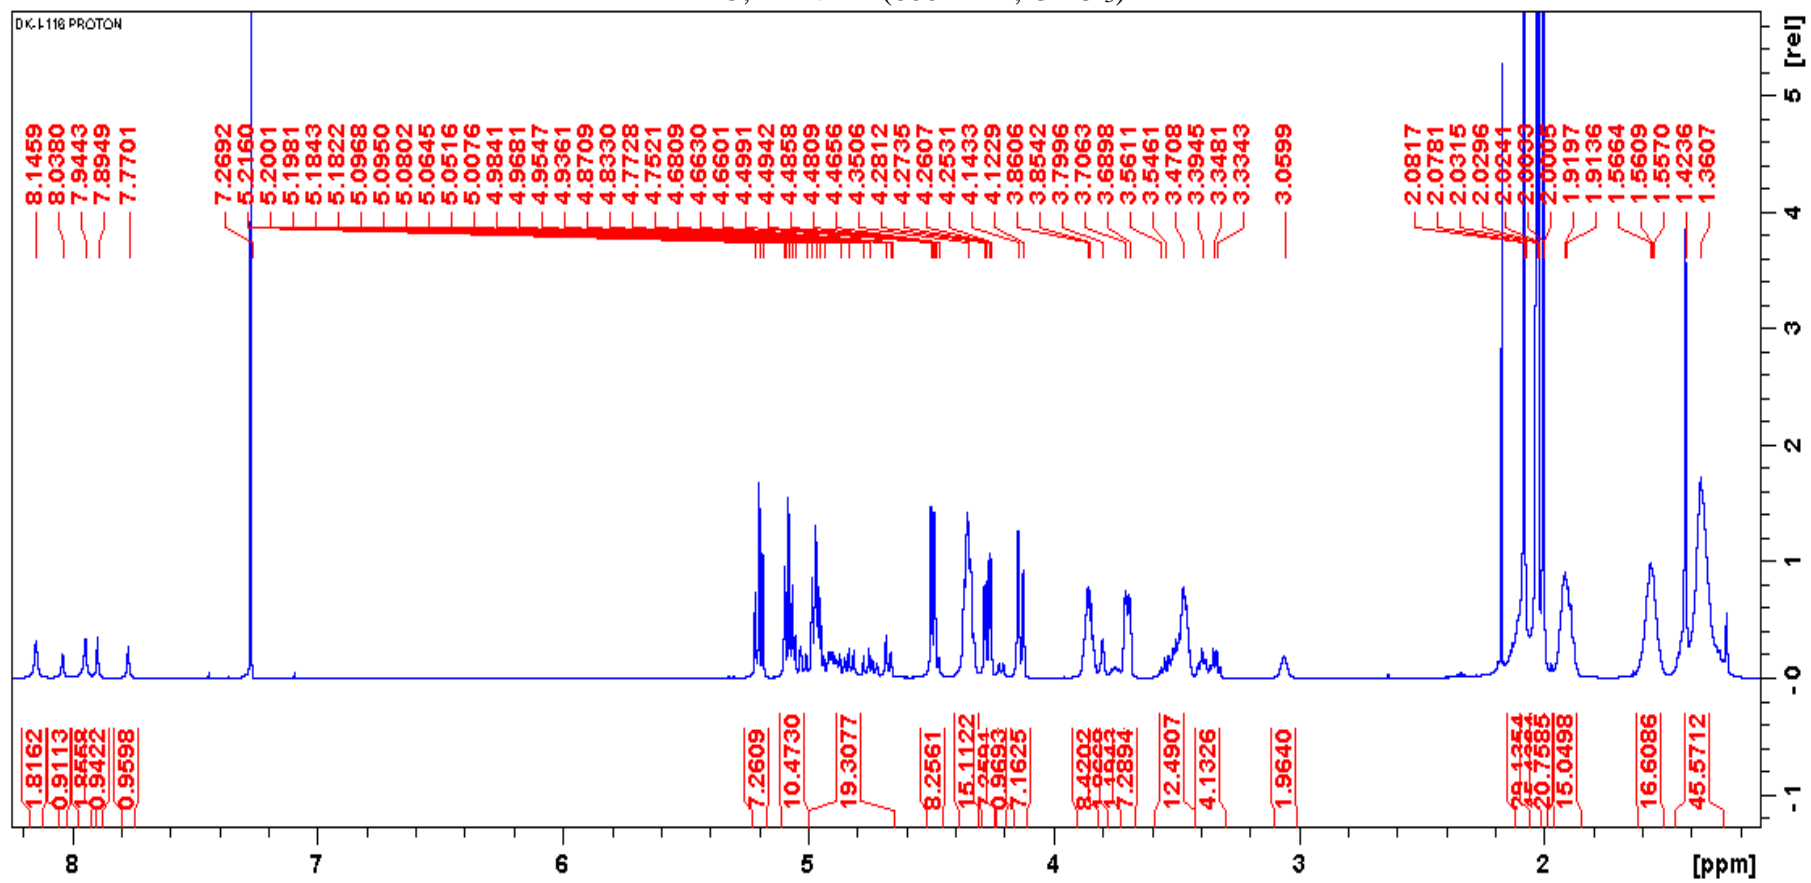

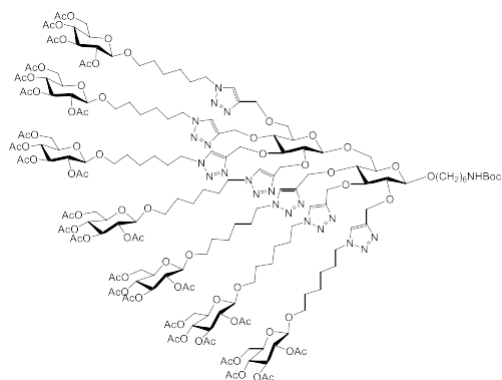

**23**, <sup>13</sup>C NMR (150 MHz, CDCl<sub>3</sub>)

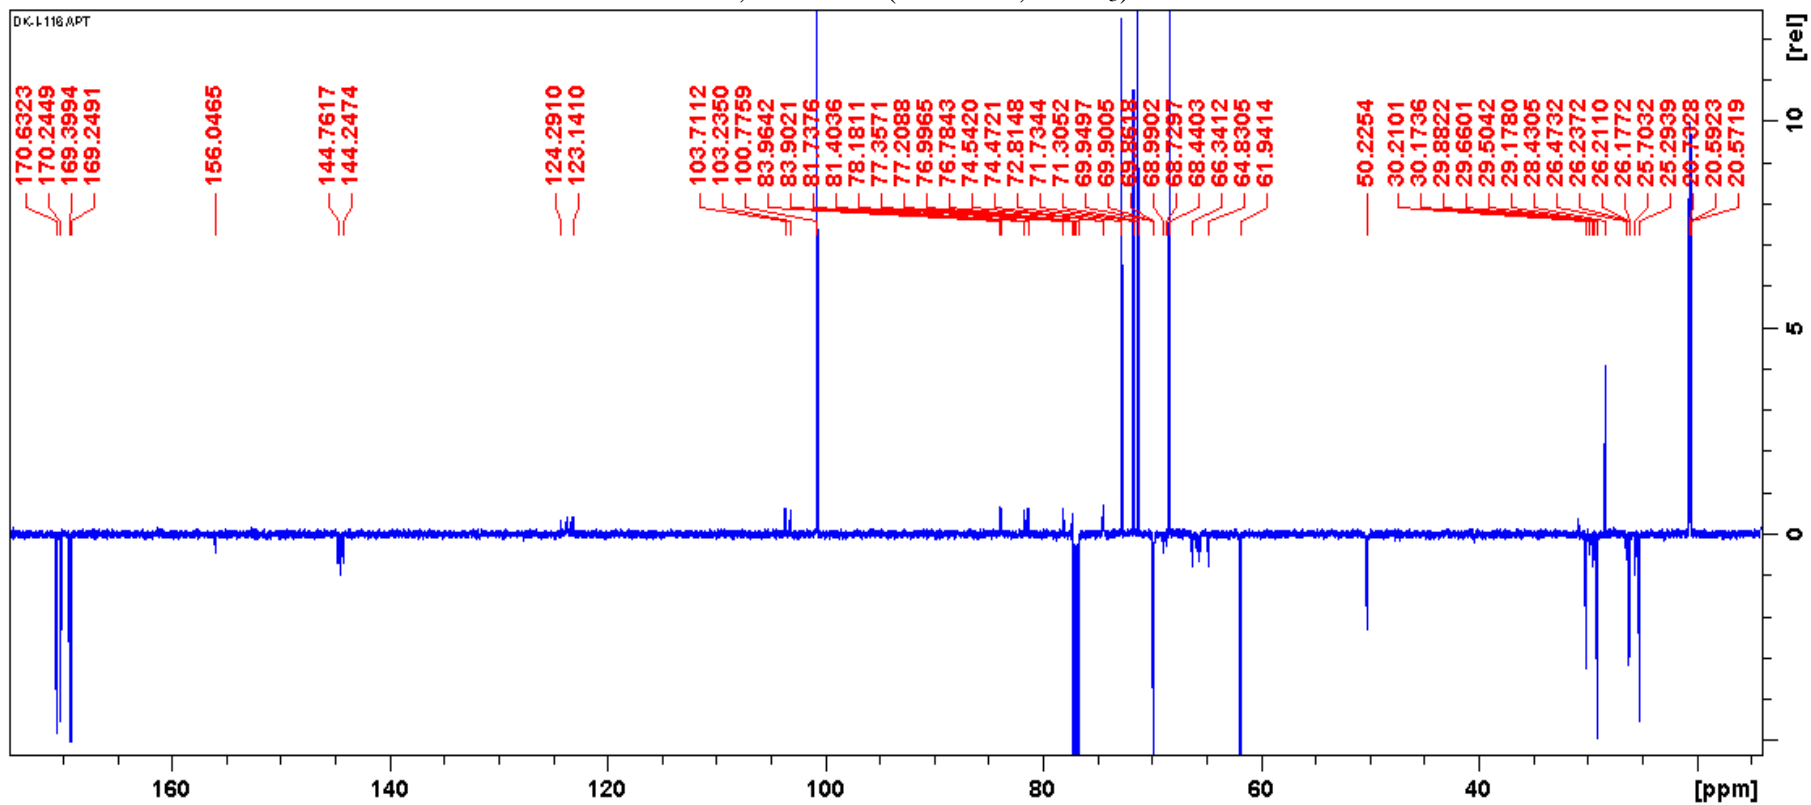

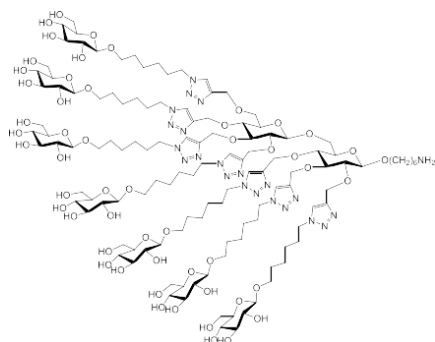24,  $^1\text{H}$  NMR (600 MHz,  $\text{D}_2\text{O}$ )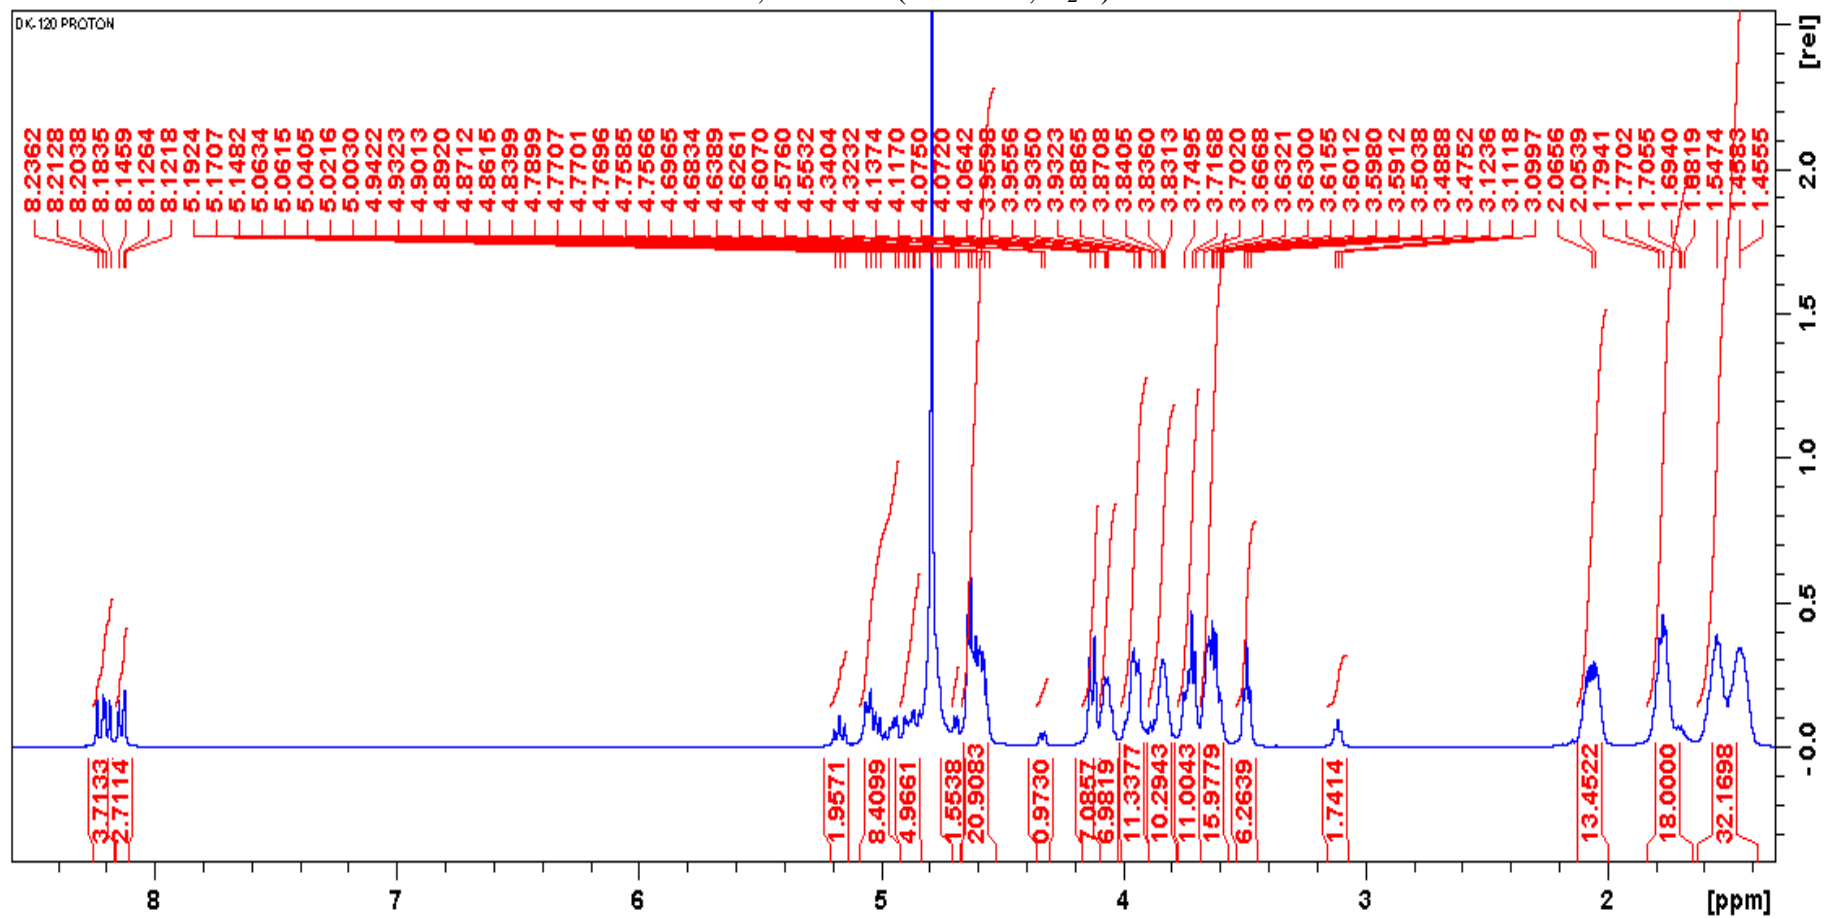





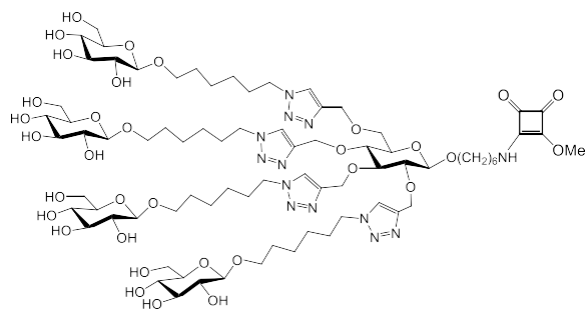25,  $^1\text{H}$  NMR (600 MHz, MeOD)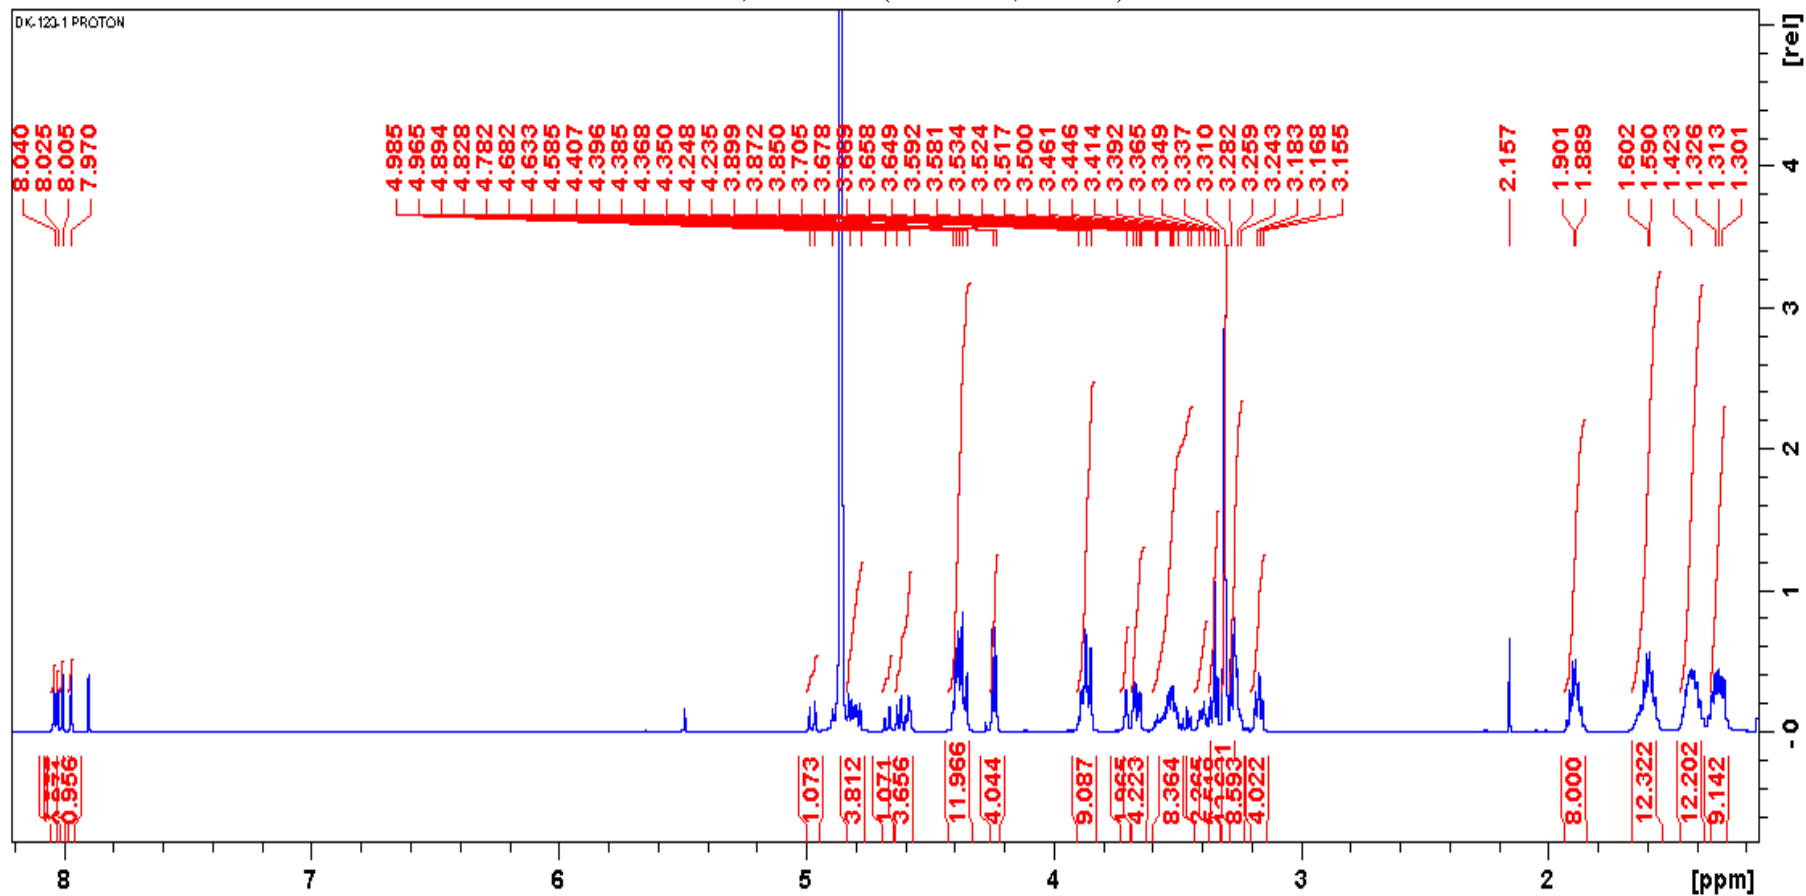



25, <sup>13</sup>C NMR (150 MHz, MeOD)

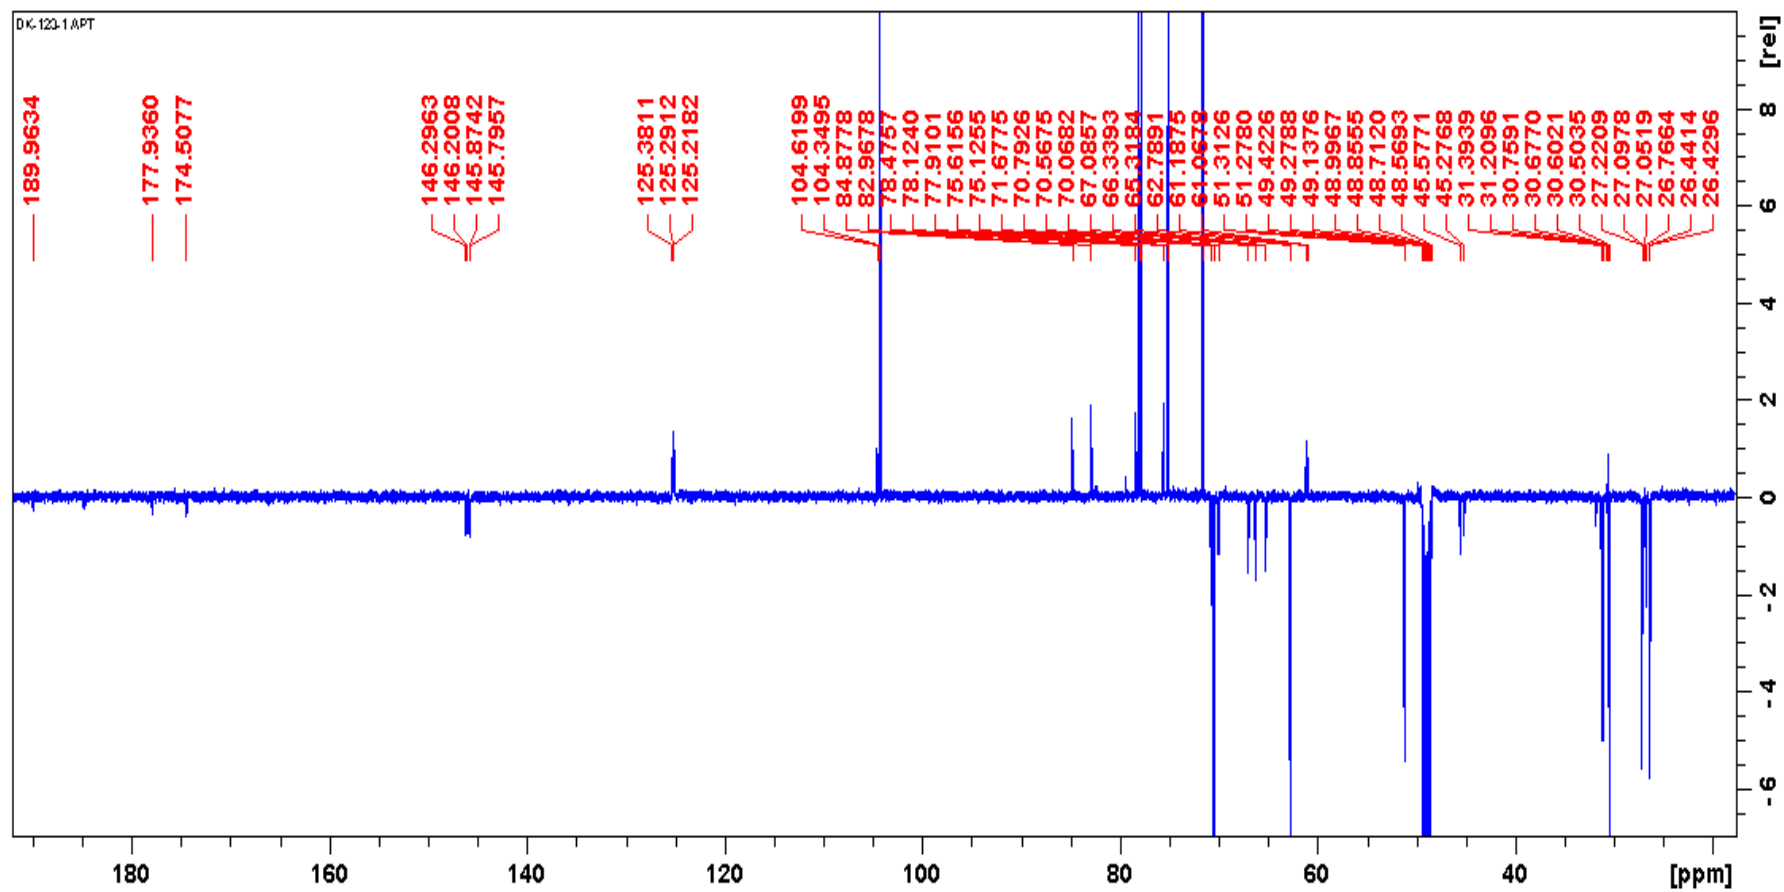

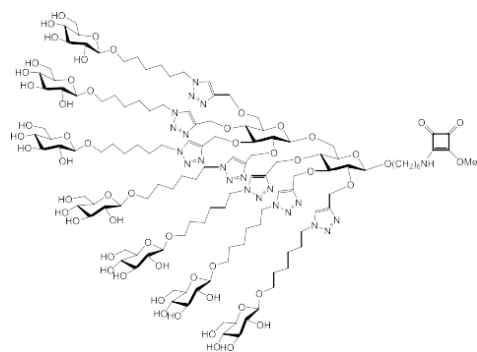27,  $^1\text{H}$  NMR (600 MHz, MeOD)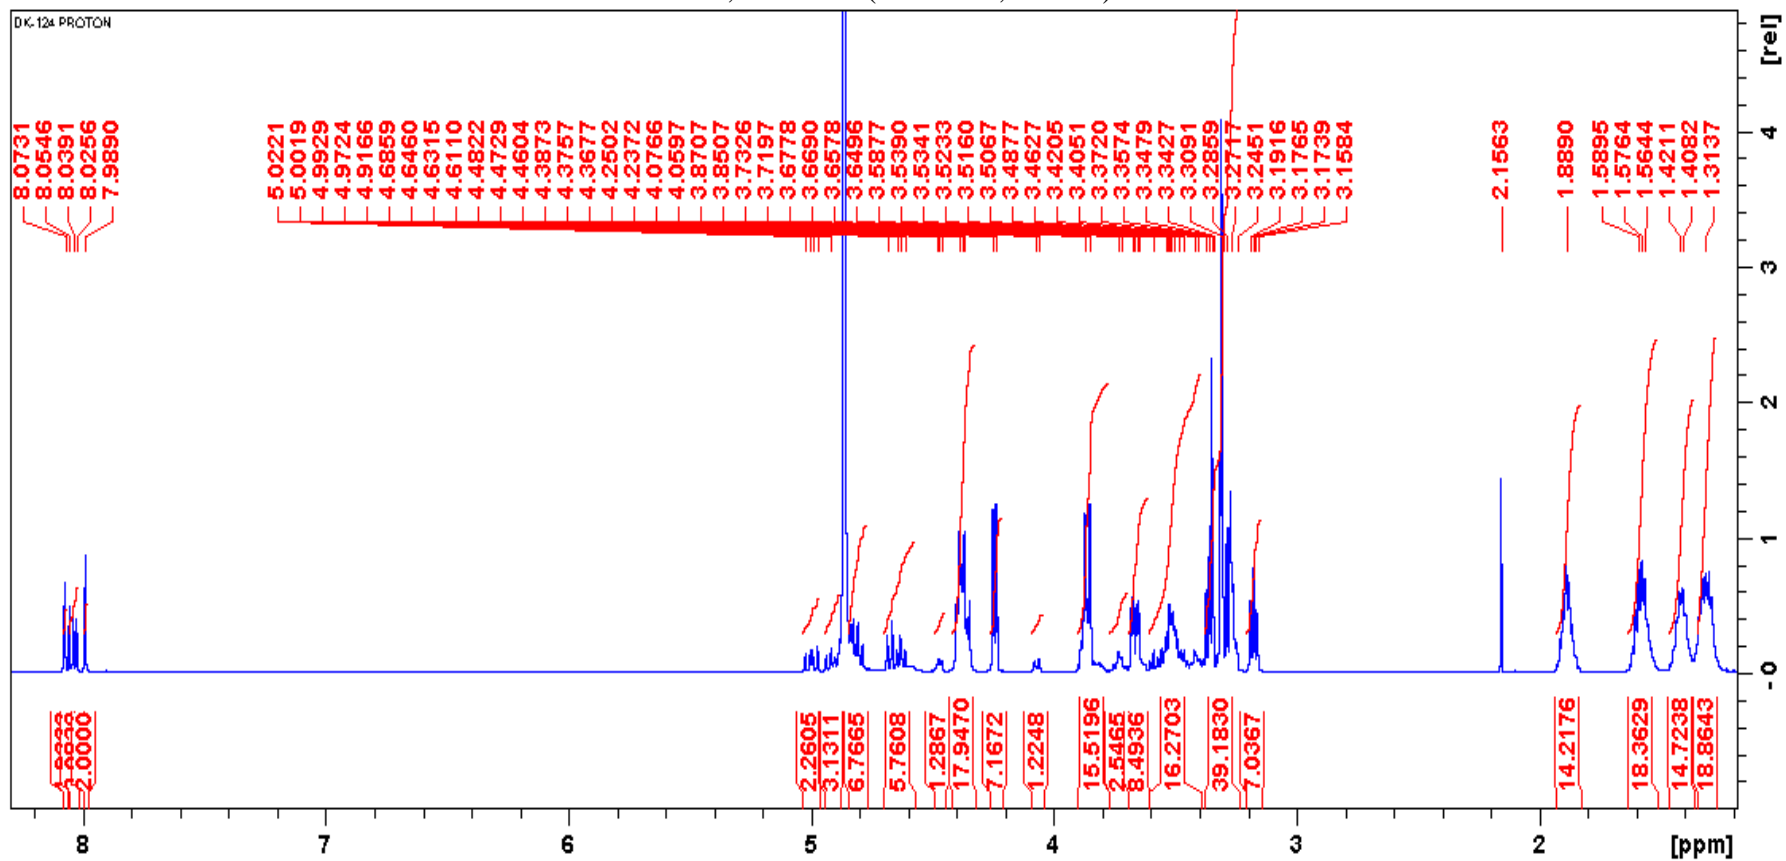

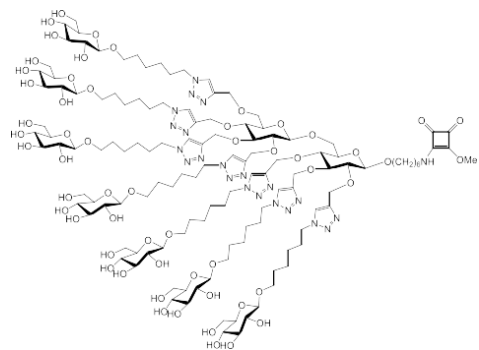27,  $^{13}\text{C}$  NMR (150 MHz, MeOD)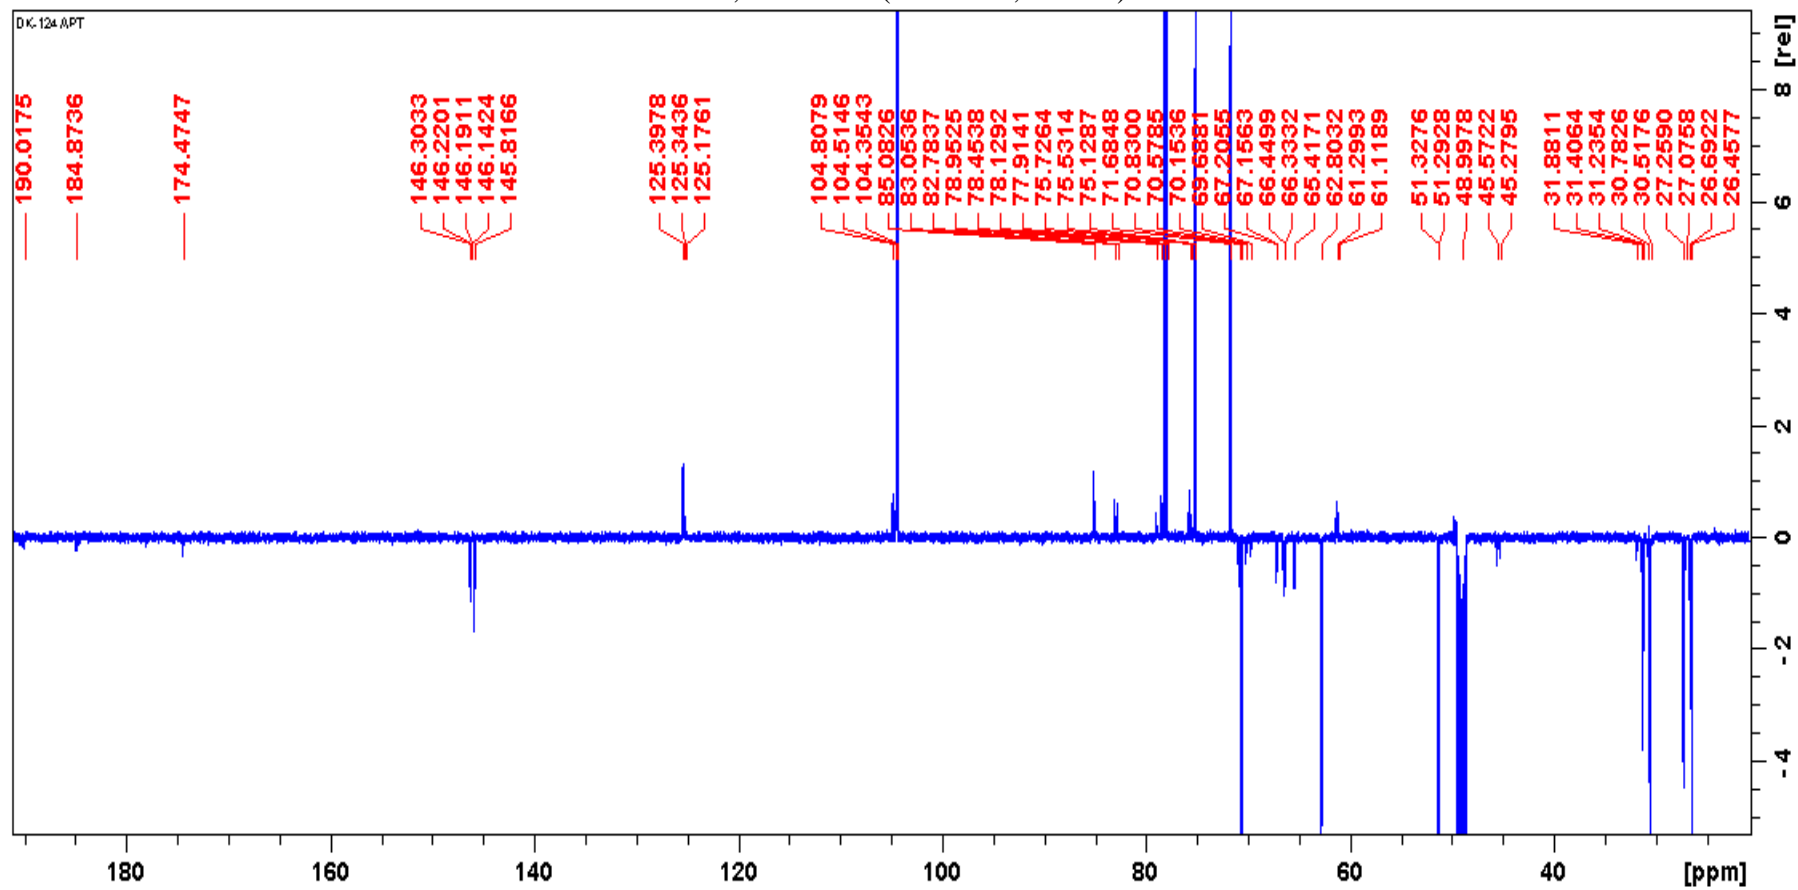

**SELDI-TOF MS of hapten-BSA Conjugate 26**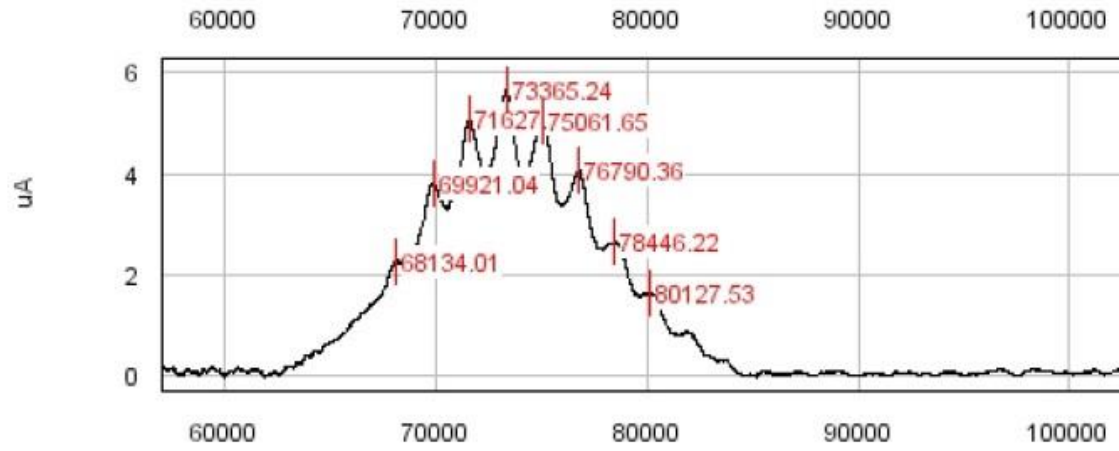**SELDI-TOF MS of hapten-BSA Conjugate 28**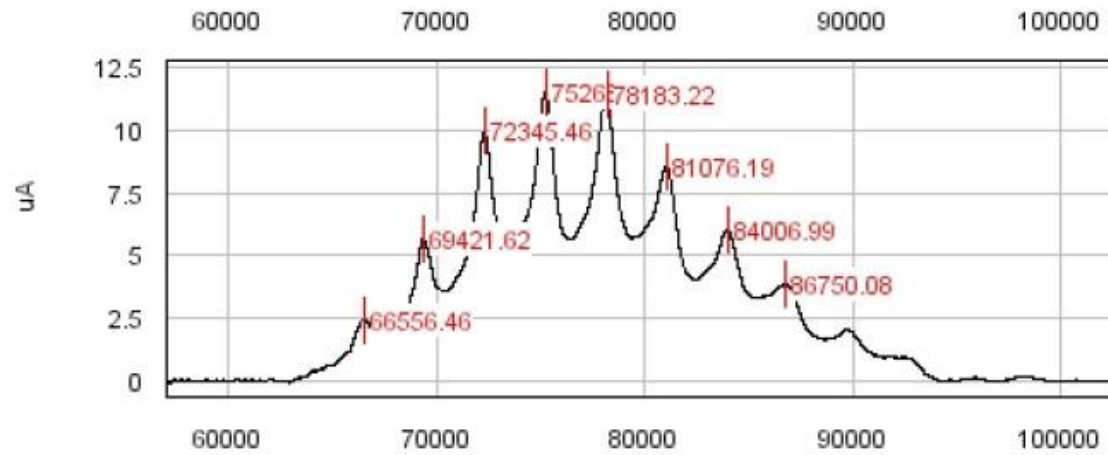

Supplement: c6ra27181b1.pdf [file c6ra27181b1.pdf]
